1 **A duplicated copy of the meiotic gene *ZIP4* preserves up to 50% pollen viability and grain**  
2 **number in polyploid wheat.**

3

4 Abdul Kader Alabdullah, Graham Moore and Azahara C. Martín

5 Crop Genetics Department, John Innes Centre, Colney, Norwich, NR4 7UH, UK

6

7 *Author for correspondence Graham Moore. Email: [graham.moore@jic.ac.uk](mailto:graham.moore@jic.ac.uk)*

8

9 **Summary**

- 10
- 11 • Although most flowering plants are polyploid, little is known of how the meiotic  
12 process evolved to stabilise and preserve polyploid fertility. On wheat  
13 polyploidisation, the major meiotic gene *ZIP4* on chromosome 3B duplicated onto 5B  
14 and subsequently diverged. This 5B meiotic gene copy (*TaZIP4-B2*) was recently shown  
15 to promote homologous pairing, synapsis and crossover, and suppress homoeologous  
16 crossover. We therefore suspected that these stabilising effects on meiosis could be  
17 important for the preservation of wheat polyploid fertility.
  - 18 • A CRISPR *Tazip4-B2* mutant was exploited to assess the contribution of the 5B  
19 duplicated *ZIP4* copy in maintaining pollen viability and grain setting.
  - 20 • Analysis demonstrated abnormalities in 56% of meiocytes in the *Tazip4-B2* mutant,  
21 with micronuclei in 50% of tetrads, reduced size in 48% of pollen grains and a near  
22 50% reduction in grain number. Further studies showed that most of the reduced grain  
23 number resulted from pollination with less viable pollen, suggesting that the  
24 stabilising effect of *TaZIP4-B2* on meiosis has a greater consequence in subsequent  
25 male, rather than female gametogenesis.
  - 26 • These studies reveal the extraordinary value of the wheat chromosome 5B *TaZIP4-B2*  
27 duplication to agriculture and human nutrition. Future studies should assess whether  
28 different *TaZIP4-B2* alleles exhibit variable effects on meiotic stabilisation and/or  
resistance to temperature change.

29 Keywords: Wheat, polyploidy, meiosis, *ZIP4*, pollen analysis, fertility

30 **Introduction**

31

32 Polyploidy occurs in a wide range of species, including fish, flatworms, shrimp, amphibians,  
33 flowering plants, wine and brewing yeast (Comai 2005; Otto 2007; Pelé *et al.* 2018; Feliner *et*  
34 *al.* 2020). The molecular mechanisms responsible for meiotic polyploidisation and diploid  
35 behaviour are important for ensuring correct chromosome segregation of multiple related  
36 chromosomes, production of balanced gametes and hence preservation of fertility. It is  
37 surprising that these mechanisms have not been more widely investigated, given their  
38 potentially enormous value to mankind (Feliner *et al.* 2020).

39

40 Plant polyploidisation is often associated with extensive chromosomal rearrangements and  
41 changes in gene content and expression (Osborn *et al.*, 2003; Adams & Wendel, 2005; Pelé *et*  
42 *al.*, 2018; Mason & Wendel, 2020). Yet analysis of the recently sequenced hexaploid wheat  
43 (*Triticum aestivum* L.) genome and wheat RNA seq datasets from over 1000 tissues (including  
44 meiocytes), did not reveal extensive gene loss or changes in expression between related  
45 (homoeologous) chromosomes following polyploidisation (Ramírez-González *et al.*, 2018).  
46 Even meiotic genes do not appear to have suffered gene loss, exhibiting mostly balanced  
47 expression between copies on related chromosomes (homoeologues) (Alabdullah *et al.*,  
48 2018). Thus, hexaploid wheat appears to have suffered less extensive rearrangement, gene  
49 loss or altered expression compared to other polyploids. This suggests a more rapid and  
50 simple adaption occurring on polyploidisation (tetraploid and hexaploid wheat) ensuring  
51 genome stability and fertility. High wheat fertility is important since it is consumed by over  
52 4.5 billion people on the planet, of whom 2.5 billion people are dependent on it (Food and  
53 Agriculture Organization of the United Nations, 2017).

54

55 It was previously accepted that a locus arising on chromosome 5B during wheat  
56 polyploidisation, was responsible for stabilising the wheat genome during meiosis, hence  
57 maintaining fertility. This was based on earlier cytogenetic studies of hexaploid wheat lines  
58 lacking the whole of chromosome 5B, which when crossed with wild relatives such as rye or  
59 *Aegilops variabilis*, exhibited homoeologous crossover between wheat and wild relative  
60 chromosomes at metaphase I in the resulting hybrids (Riley & Chapman, 1958; Sears &  
61 Okamoto, 1958). Deletion of the whole 5B chromosome resulted in the loss of multiple  
62 meiotic genes but it was unclear at the time which and how many of these genes needed to  
63 be lost to produce the phenotype. However, it was recognised from these early studies that  
64 suppression of homoeologous crossover was important for stabilising the wheat genome and  
65 maintaining its fertility. In 1971, a study coined the term 'pairing homoeologous' (*Ph1*) for this  
66 'critical locus' on 5B, responsible for suppressing the homoeologous crossover observed in  
67 wheat-wild relative hybrids (Wall *et al.*, 1971). Loss of *Ph1* (or of the whole 5B chromosome,  
68 as in these studies) allowed homoeologous crossover to take place. The term 'pairing' was  
69 used synonymously with crossover observed at metaphase I at this time. '*Ph1*' became the  
70 accepted term to describe the locus responsible for the homoeologous crossover suppression  
71 phenotype.

72

73 Sears (1977) identified a mutant (named *ph1b*) carrying a deletion of part of chromosome 5B  
74 (now known to be 59.3Mb in size, encompassing some 1187 genes (Martín *et al.*, 2018)).  
75 When the Sears *ph1b* mutant is crossed with wild relatives to form hybrids, crossover  
76 between homoeologues is subsequently observed during meiosis in these hybrids.  
77 Exploitation of such mutants in crosses with wild relatives has allowed the transfer of traits  
78 from wild relatives into wheat, saving the global economy billions of dollars over the years.  
79 Later, Roberts *et al.*, (1999) observed that mutants carrying deletions in the long arm of

80 chromosome 5B, could be separated into 2 groups by scoring the meiotic configurations at  
81 metaphase I of the mutants themselves. The presence or absence of multivalents at  
82 metaphase I did not distinguish these 5B deletion mutants. However, it was observed that  
83 univalents, rod bivalents and multivalents were present in over 50% of meiocytes at  
84 metaphase I in the Sears *ph1b* mutant and also some of the 5B deletion mutants, while the  
85 wild type (WT) wheat and the remaining 5B deletion mutants exhibited mainly bivalents at  
86 metaphase I in all their meiocytes. Thus, the presence of meiotic abnormalities in over 50%  
87 of meiocytes could separate the 5B deletion mutants into two groups (Roberts *et al.*, 1999).  
88 The presence of multivalents suggested that the initial alignment of chromosomes (now  
89 termed pairing) and intimate pairing (now termed synapsis) of chromosomes was disrupted.

90

91 Recently the two phenotypes (suppression of homoeologous crossover (*Ph1*) in wheat-wild  
92 relatives, and the presence of meiotic abnormalities in 50% of meiocytes in the mutant itself)  
93 have been defined using a series of 5B deletions to a 0.5Mb region of chromosome 5B  
94 containing a copy of the major meiotic gene *ZIP4* (*TaZIP4-B2*) (Griffiths *et al.*, 2006; Al-Kaff *et*  
95 *al.*, 2008; Rey *et al.*, 2017; Martín *et al.*, 2018; Rey *et al.*, 2018a). Genome analysis revealed  
96 that hexaploid wheat possessed a further three *ZIP4* genes on group 3 chromosomes (*ZIP4 3A*  
97 (*TaZIP4-A1*), *ZIP4 3B* (*TaZIP4-B1*) and *ZIP4 3D* (*TaZIP4-D1*)). Analysis by the International  
98 Wheat Genome Sequencing Consortium (2018) confirmed that on wheat polyploidisation,  
99 *TaZIP4-B2* was derived from *TaZIP4-B1* through a trans-duplication event.

100

101 *ZIP4* is a protein containing tetratricopeptide repeats (TPRs). Proteins with such tandem TPRs  
102 can form folds which assemble protein complexes (Blatch & Lassle, 1999; D'Andrea & Regan,  
103 2003). In *Sordaria* (and budding yeast), *ZIP4* is necessary for pairing, synapsis and homologous  
104 crossover (Tsubouchi *et al.*, 2006; Dubois *et al.*, 2019; Pyatnitskaya *et al.*, 2019), whereas, in  
105 *Arabidopsis* and rice, *ZIP4* has previously only been reported necessary for homologous  
106 crossover (Chelysheva *et al.*, 2007; Shen *et al.*, 2012). In wheat however, *TaZIP4-B2* promotes  
107 homologous pairing, synapsis and crossover (since in the wheat CRISPR *Tazip4-B2* mutant,  
108 50% of meiocytes exhibit meiotic abnormalities, the phenotype reported by Roberts *et al.*,  
109 (1999) (Rey *et al.*, 2018a)). Suppression of homoeologous crossover by *ZIP4* has not  
110 previously been reported in any species, however when the CRISPR *Tazip4-B2* deletion  
111 mutant is crossed with a wild relative to form a hybrid, homoeologous crossover takes place  
112 in the hybrid (Rey *et al.*, 2018a), implying a role for *TaZIP4-B2* in homoeologous crossover  
113 suppression. Thus, the duplication of *ZIP4* on wheat polyploidisation led to an adaption during  
114 meiosis I, preventing meiotic disruption by promoting homologous pairing, synapsis and  
115 crossover, and suppressing homoeologous crossover.

116

117 Following meiosis I, the reductional division during wheat male meiosis (meiosis II), leads to  
118 the formation of tetrads each containing four microspores, which degenerate to release  
119 individual uninucleate microspores. An asymmetric mitotic division takes place in each  
120 microspore to produce a large vegetative cell and a small generative cell. Subsequently, the

121 small generative cell undergoes a second mitotic division to form a mature trinucleate pollen  
122 grain, with one vegetative nucleus and two generative nuclei or sperm cells. Reductional  
123 division in wheat female meiosis results in a T-shaped tetrad, containing 4 megaspores. Only  
124 one of the megaspores develops into an embryo sac, with the remaining 3 megaspores  
125 degenerating. Hence, whilst all four products of meiosis survive on the male side, only one  
126 survives on the female side. Meiosis is an essential process for the formation of gametes.  
127 Thus, meiotic abnormalities or genetic disruptions are likely to result in reduced fertility.  
128 Meiotic abnormalities on the male side may be associated with variable sized and/or inviable  
129 pollen grains, and on the female side, with a partial reduction in grain number or complete  
130 sterility (Pagliarini, 2000; Sheidai *et al.*, 2009; 2010; Dewitte *et al.*, 2010; Kumar *et al.*, 2010;  
131 Jiang *et al.*, 2011; Singhal & Kaur, 2011; Kaur & Singhal, 2019).

132  
133 In the polyploid literature, it is often stated that meiotic adaptation is important for polyploid  
134 fertility. However, it has not previously been possible to determine the effect of an actual  
135 meiotic adaptation. The availability of a CRISPR deletion mutant for the duplicated *TaZIP4-B2*  
136 copy allows us to assess the effect of this meiotic adaptation on the correct segregation of  
137 chromosomes, effective production of balanced gametes, and hence preservation of pollen  
138 viability and grain number in this major global crop. As part of this assessment, a new pollen  
139 profiling method has been developed and exploited to compare pollen profiles of different  
140 mutants in hexaploid (and tetraploid) wheat.

## 141 142 **Materials and Methods**

### 143 144 **Plant material**

145 Three different *Tazip4-B2* mutants were used in this study: 1) *ph1b*: a hexaploid wheat *T.*  
146 *aestivum* cv. Chinese Spring mutant with a gamma radiation induced 59.3 Mb deletion in the  
147 long arm of chromosome 5B, including the *TaZIP4-B2* gene copy (Sears, 1977; Griffiths *et al.*,  
148 2006); 2) CRISPR *Tazip4-B2*: a hexaploid wheat *T. aestivum* cv. Fielder mutant with a CRISPR-  
149 induced 114 bp deletion in exon 1 of *TaZIP4-B2* leading to the deletion of 38 amino acids (A<sup>104</sup>  
150 to E<sup>141</sup>) from the TaZIP4-B2 protein (Rey *et al.*, 2018a); 3) *ph1c*: a tetraploid wheat *T.*  
151 *turgidum* subsp. *Durum* cv. Senatore Cappelli mutant carrying a large deletion in the long arm  
152 of chromosome 5B, including the *TaZIP4-B2* gene (Giorgi, 1983; Jampates & Dvorak, 1986;  
153 Roberts *et al.*, 1999).

### 154 155 **Pollen profiling**

156 Plants were grown in a controlled environment room (CER) at 20 °C (day) and 15 °C (night),  
157 with a 16-hr photoperiod and 70% humidity. Ten plants were grown for each genotype. The  
158 first spike per plant was labelled for collection of anthers. Mature yellow anthers were  
159 collected just before shedding pollen, from five main florets at the middle portion of the spike.  
160 Each of three anthers from the same floret were placed in an Eppendorf containing 0.5 ml of  
161 70% ethanol and stored at 4°C for later pollen counts and size measurements. Pollen grains

162 were released from anthers by sonication using Soniprep 150 Plus (MSE, Heathfield, East  
163 Sussex, UK) at amplitude 5 for 30 seconds. The sonicated pollen samples were filtered through  
164 200 µm sieves using 100 ml Coulter Isoton II diluent (Beckman Coulter) to eliminate anther  
165 debris. Size and number of filtered pollen grains were measured using a Coulter counter  
166 (Multisizer 4e, Beckman Coulter Inc.), fitted with a 200 µm aperture tube, with Isoton II  
167 diluent (using the following settings: Control mode: volumetric; Analytic volume: 2000 µl;  
168 Electrolyte volume: 100 mL; Size bins = 400 from 4 µm to 120 µm; Current: 1600 µA; Stirring  
169 speed: 20 CW). For each sample, the measured pollen number distribution over size bins was  
170 exported into a csv file, then an R script (Text S1) used to extract and calculate plot differential  
171 pollen size distribution and pollen number per anther from the raw data files for each  
172 genotype.

173

#### 174 **Pollen viability**

175 Pollen viability was assessed using Alexander stain (Alexander, 1969). Briefly, Alexander stain  
176 was prepared according to Alexander (1969). Fresh wheat pollen grains from three anthers  
177 were shed on a droplet of Alexander stain placed on a microscopic slide and covered with a  
178 coverslip for microscopic observation. Images were taken from several random microscope  
179 field views to be scored. Magenta-coloured pollen was considered viable, whereas blue-green  
180 pollen was considered to be non-viable or sterile. Three biological replicates with >1000  
181 pollen grains each were analysed for each genotype.

182

#### 183 **Grain number per spike assessment**

184 The effect of *Tazip4-B2* mutants on grain number per spike (or grain setting) was assessed  
185 under CER and glasshouse conditions. In the CER, plants from each of the four genotypes  
186 CRISPR *Tazip4-B2*, *ph1b* and their corresponding WTs, were grown at 20 °C (day) and 15 °C  
187 (night) with a 16-hr photoperiod and 70% humidity. In the glasshouse, 11-15 plants from each  
188 of the CRISPR *Tazip4-B2* and *ph1b* mutants, with their corresponding WTs, were grown at  
189 22 °C (day) and 17 °C (night) with an 8-hr photoperiod and 70% humidity. In both  
190 experiments, the first three spikes from each plant were tagged, bagged at the heading stage,  
191 harvested when fully dried, and threshed separately after counting spikelet number. The  
192 number of grains per spike was then measured using the MARVIN grain analyser (GTA  
193 Sensorik GmbH, Neubrandenburg, Germany). Grain number per spike ((actual grain number  
194 per spike/expected grain number per spike)\*100) was normalised in order to eliminate the  
195 effect of different number of spikelets per spike on grain number. Expected grain number was  
196 calculated by multiplying number of spikelets by three, considering that each spikelet has  
197 three main fertile florets.

198

#### 199 **Female sterility assessment**

200 Female sterility was assessed through the emasculation/pollination method, using the CRISPR  
201 *Tazip4-B2* mutant as both pollen donor and recipient. Three treatments were involved in this  
202 experiment: 1) Using CRISPR *Tazip4-B2* mutant as the 'pollen recipient', where the mutant

203 was pollinated with pollen from the WT *T. aestivum* cv. Fielder (pollen donor), 2) Using CRISPR  
204 *Tazip4-B2* mutant as a 'pollen donor', where WT plants were pollinated with CRISPR *Tazip4-*  
205 *B2* pollen; 3) Emasculating WT plants and pollinating them with WT pollen, providing a control  
206 for measurement of emasculation and pollination procedure efficiency. For each pollination  
207 experiment, at least twelve spikes were emasculated at the heading stage when the spike had  
208 fully emerged from the flag leaf and anthers were still green with a tight stigma. Spikelets  
209 located at the tip and base of the spike and florets in the centre of each spikelet were removed  
210 before emasculation, as they are usually asynchronous to the rest of the spike and frequently  
211 sterile. Emasculated spikes were covered with crossing bags to avoid dehydration and any  
212 unwanted cross-pollination. When the emasculated floret stigma was receptive and mature  
213 (usually 2-3 days after emasculation), pollination was performed using fresh pollen grains  
214 collected from fully mature anthers just at opening stage. All emasculations and pollinations  
215 were undertaken at the same time of day (in the morning) to avoid any possible circadian  
216 effects on stigma and pollen fertility. Grain number was then counted for each spike and  
217 normalised by dividing the number of grains by the number of pollinated florets per spike.

218

### 219 **Seed germination rate**

220 Germination rates of seeds resulting from the emasculation/pollination experiment were  
221 evaluated to assess the paternal and maternal effect of the *Tazip4-B2* mutant on embryo  
222 development after fertilization. Before germination, seeds were disinfected by soaking in 5%  
223 Sodium Hypochlorite for 5 minutes and then washed with distilled water. Seeds were placed  
224 in Petri dishes (9 cm diameter) containing two layers of filter paper wetted continuously with  
225 distilled water. Each Petri dish represented a replicate containing 15 seeds originating from  
226 the same spike. Five replicates were used for each treatment. Petri dishes were wrapped with  
227 aluminium foil and placed in a growth chamber at 22°C. The seeds were considered to have  
228 germinated after radicle emergence. Germination period was 10 days. The germination  
229 percentage was calculated as (number of seeds germinated /total seeds) x 100.

230

### 231 **Meiotic analysis**

232 Anthers were collected at the desired meiotic stage as previously described (Martín *et al.*,  
233 2017) and fixed in freshly prepared 100% ethanol/glacial acetic acid 3:1 (v/v). The material  
234 was transferred to fresh fixative after 1–2 hr and stored at 4 °C until needed for Feulgen or  
235 FISH (fluorescence *in situ* hybridisation) studies. Cytological analysis of Pollen Mother Cells  
236 using the Feulgen technique was performed as previously described (Sharma & Sharma,  
237 2014). Anthers fixed at the tetrad stage were used for FISH analysis. Preparations were made  
238 as described by Rey *et al.*, (2018b). The repetitive sequence 4P6 (Zhang *et al.*, 2004) was  
239 amplified by PCR as previously described (Rey *et al.*, 2018b) and labelled using the DIG-nick  
240 translation mix (Sigma, St. Louis, MO, USA) according to the manufacturer's instructions. The  
241 repetitive probe pTa71, containing 1 unit of 18S-5.8S-26S rDNA (8.9 kb) from *T. aestivum*  
242 (Gerlach & Bedbrook, 1979) was labelled using the Biotin-nick translation mix (Sigma).  
243 Digoxigenin-labelled probes were detected with anti-digoxigenin-fluorescein Fab fragments



244 (Sigma) and Biotin-labelled probes were detected with Streptavidin-Cy5 (Thermo Fisher  
245 Scientific, Waltham, Massachusetts, USA). FISH was performed as described previously (Rey  
246 *et al.*, 2018b).

247

### 248 **Image processing**

249 Pollen grains and Pollen Mother Cells stained by the Feulgen technique were imaged using a  
250 LEICA DM2000 microscope (Leica Microsystems, <http://www.leica-microsystems.com/>),  
251 equipped with a Leica DFC450 camera and controlled by LAS v4.4 system software (Leica  
252 Biosystems, Wetzlar, Germany). Tetrads labelled by FISH were imaged using a Leica DM5500B  
253 microscope equipped with a Hamamatsu ORCA-FLASH4.0 camera and controlled by Leica LAS  
254 X software v2.0. Z-stacks were processed using the 561 deconvolution module of the Leica  
255 LAS X Software package. Images were processed using Adobe Photoshop CS5 (Adobe Systems  
256 Incorporated, US) extended version 12.0 × 64.

257

### 258 **TaZIP4 proteins sequence analyses**

259 The DNA, CDs and protein sequences of the four *TaZIP4* homologues were retrieved from the  
260 *Ensembl Plants* database for *Triticum aestivum* (IWGSC v1.1 gene annotation; International  
261 Wheat Genome Sequencing Consortium, 2018). Multiple sequence alignments of coding  
262 sequences (CDs) and protein sequences of *TaZIP4-A1* (TraesCS3A02G401700.3), *TaZIP4-B1*  
263 (TraesCS3B02G434600.2), *TaZIP4-B2* (TraesCS5B02G255100.1), *TaZIP4-D1*  
264 (TraesCS3D02G396500.2) and the mutant CRISPR *Tazip4-B2* (Rey *et al.*, 2018a) were  
265 performed using the Clustal X programme (version 2; Higgins & Sharp, 1988; Larkin *et al.*,  
266 2007). Functional domain prediction in the protein sequences was performed using the online  
267 InterPro programme (version 82.0; Mitchell *et al.*, 2019). Tetratricopeptide Repeats (TPRs) in  
268 the *TaZIP4* proteins were predicted using the online TPRpred program (version 11.0; Magis *et*  
269 *al.*, 2014; Zimmermann *et al.*, 2018). Prediction of coiled coil domains in the *TaZIP4* proteins  
270 was performed using the MARCOIL programme (Delorenzi & Speed, 2002; Zimmermann *et*  
271 *al.*, 2018).

272

273

274

## 275 **Results**

276

### 277 **Divergence and the CRISPR deletion occur within the TaZIP4-B2 TPR domain**

278 The InterProScan (Mitchell *et al.*, 2019) and PFAM programmes identified a single highly  
279 conserved SPO22 domain (PF08631) within the EBI database ZIP4s. This SPO22 domain was  
280 composed of tetratricopeptide repeats (TPRs) of 34 amino acids. A second SPO22 domain of  
281 low significance was observed in tandem with the highly conserved SPO22 domain in many  
282 ZIP4s. Only PFAM classified this second SPO22 domain as being significant for a limited  
283 number of these ZIP4s. ZIP4 function is dependent on these SPO22 Tpr-containing domains,  
284 due to their involvement in assembling protein complexes (Blatch & Lassle, 1999; D'Andrea

285 & Regan, 2003). The annotation programmes enabled us to assess whether the divergence of  
286 *TaZIP4-B2* from its chromosome group 3 homoeologues (*TaZIP4-A1*, *TaZIP4-B1* and *TaZIP4-*  
287 *D1*) occurred within the SPO22 domain. Similarly, we used the annotation programmes to  
288 determine the site of the in-frame 38 amino acid CRISPR deletion of *Tazip4-B2* (Rey *et al.*,  
289 2018a) relative to the SPO22 domain. Multiple sequence alignments showed that *TaZIP4-B2*  
290 was quite divergent from the other group 3 homoeologues (Fig. 1a). The percentage of  
291 identity between *TaZIP4-B2* and the other homoeologues did not exceed 85.8% in coding  
292 sequences (CDs) and 92.2% in protein sequences, whereas the inter-identity of *TaZIP4-A1*,  
293 *TaZIP4-B1* and *TaZIP4-D1* ranged from 94.9% - 96.3% for CDs sequences and from 96.8% -  
294 97.5% for protein sequences (Table S1). The InterProScan and PFAM programmes identified  
295 the highly conserved SPO22 domain within all the wheat ZIP4s, with PFAM identifying a  
296 second SPO22 domain in tandem (Fig. 1b). TPRpred (Zimmermann *et al.*, 2018) identified 12  
297 TPRs within wheat ZIP4-B1 (Fig. 1c), showing that up to half of total ZIP4-B1 protein consisted  
298 of TPRs. However, the region of *TaZIP4-B2* corresponding to the 3<sup>rd</sup> TPR of ZIP4-B1 within the  
299 highly conserved SPO22 domain, was no longer identified as a TPR by TPRpred. Thus, within  
300 wheat *TaZIP4-B2*, only 11 TPRs were identified. The 2<sup>nd</sup> and 4<sup>th</sup> TPRs of *TaZIP4-B2* and *TaZIP4-*  
301 *B1* also exhibited some divergence with respect to each other. As a result of this divergence,  
302 the MARCOIL programme (Zimmermann *et al.*, 2018; Delorenzi & Speed, 2002) suggested an  
303 altered conformation within the conserved SPO22 domain of *TaZIP4-B2* compared to the  
304 domains of *TaZIP4-B1* and other ZIP4 homoeologues (Fig. 1d). Thus, duplication of *TaZIP4-B2*  
305 from *TaZIP4-B1* led to TPR divergence (especially the 3<sup>rd</sup> TPR (Table S1)), giving rise to  
306 associated changes in protein conformation. This predicts that *TaZIP4-B2* function may be  
307 altered with respect to that of its chromosome group 3 homoeologues. The 38 amino acid in-  
308 frame CRISPR deletion (within the CRISPR *Tazip4-B2*) covered the 1<sup>st</sup> TPR, indicating that the  
309 deletion did indeed affect the SPO22 domain and correlated with complete loss of the *TaZIP4-*  
310 *B2* phenotype (Rey *et al.*, 2018a).

311

### 312 **Effect of the *TaZIP4-B2* deletion on meiotic and tetrad stages**

313 Average meiotic scores from *Tazip4-B2* mutants at metaphase I were reported previously  
314 (Martín *et al.*, 2014; Rey *et al.*, 2018a). However, the present study required meiotic scores  
315 from individual meiocytes from *Tazip4-B2* mutants at metaphase I, in order to relate meiotic  
316 abnormalities observed during metaphase I with those observed at subsequent stages. Both  
317 CRISPR *Tazip4-B2* (Rey *et al.*, 2018a) and *ph1b* (Sears, 1977) mutants were exploited. The  
318 *ph1b* mutant carries a 59.3Mb deletion encompassing some 1187 genes, including *TaZIP4-B2*  
319 (Martín *et al.*, 2018). Meiotic scores from individual meiocytes at metaphase I from CRISPR  
320 *Tazip4-B2* (Rey *et al.*, 2018a), *ph1b* (Martín *et al.*, 2014) and their respective wild type plants  
321 are provided in Table 1, Table S2 and visualised in Fig. 2. Examples of meiotic configurations  
322 of the CRISPR *Tazip4-B2* mutant and wild type (WT Fielder) plants at metaphase I are provided  
323 in Fig. 3a, b. More than half of the scored meiocytes in the CRISPR *Tazip4-B2* and *ph1b*  
324 mutants had meiotic abnormalities (Fig. 2). Overall, univalents and/or multivalents were  
325 observed in 56% of both the CRISPR *Tazip4-B2* and *ph1b* mutant meiocytes. Univalents were



326 present in 49% and 43% of meiocytes at metaphase I (average per meiocyte 1.16 and 0.8) for  
327 the CRISPR *Tazip4-B2* and *ph1b* mutants respectively. Multivalents were present in 32% and  
328 43% (average per meiocyte 0.39 and 0.53) of the CRISPR *Tazip4-B2* and *ph1b* mutant  
329 meiocytes respectively. The slight excess of multivalents and lack of univalents in the *ph1b*  
330 mutant compared to the CRISPR *Tazip4-B2* mutant may be simply due to accumulation of the  
331 extensive rearrangements observed and reported in this mutant (Martín *et al.*, 2018), which  
332 can form multivalents at metaphase I (Table 1; Table S2). The excess of multivalents in the  
333 *ph1b* mutant could also be explained by additional unknown deleted genes within the 59.3Mb  
334 5B deletion, but the issue cannot be resolved by just scoring for the presence or absence of  
335 multivalents at metaphase I, as scoring multivalents alone would fail to distinguish between  
336 different deletion mutants covering variable lengths of the long arm of 5B (Roberts *et al.*,  
337 1999). Thus the deletion of *TaZIP4-B2* leads to nearly half of meiocytes possessing univalents  
338 as a result of pairing and crossover failure, and a third of meiocytes possessing multivalents  
339 as a result of incorrect pairing and crossover.

340  
341 Meiotic aberrations at metaphase I (univalents and multivalents) can lead to imbalanced  
342 chromosomal segregation at anaphase I, with subsequent disruption to the post-meiotic  
343 process. Therefore, the stages following metaphase I were studied in both the WT Fielder and  
344 the CRISPR *Tazip4-B2* mutant. In WT Fielder, homologous chromosomes (homologues)  
345 appear connected to each other by one or mostly several crossovers (Fig. 3a), with only an  
346 occasional univalent being present during metaphase I. Each homologue separates to a  
347 different pole of the nucleus during anaphase I, resulting in equal separation of homologues  
348 (Fig. 3c, e). After the second meiotic division, tetrads with four balanced gametes each are  
349 formed (Fig. 3g). In the CRISPR *Tazip4-B2* mutant, univalents, multivalents and a global  
350 reduction in the number of crossovers were observed at metaphase I (Fig. 3b), as previously  
351 reported (Rey *et al.*, 2018a). Although unbalanced segregation of chromosomes would be  
352 expected during anaphase I as a consequence of disrupted crossover distribution, disruptions  
353 observed were greater than expected, with regular presence of lagging chromosomes, split  
354 sister chromatids and chromosome fragmentation (Fig. 3d, f). The high number of micronuclei  
355 (MN) observed in tetrads, the final product of meiosis, was the most surprising result (Fig. 3h,  
356 j). MN are formed as a consequence of laggard chromosomes or fragments from mis-division  
357 that have not been included in telophase I nuclei and are maintained during the second  
358 meiotic division (Morrison, 1953). It is not unusual to find an occasional MN in wheat. Indeed,  
359 some were found in the WT Fielder analysed in this study (less than 5% of tetrads), probably  
360 due to an occasional univalent observed at metaphase I. However, in the CRISPR *Tazip4-B2*  
361 mutant, it was striking that more than 50% of tetrads showed at least one MN (Fig. 3i); one,  
362 two and less frequently three MN per tetrad were detected. Fluorescence *in situ*  
363 hybridisation (FISH) was performed on tetrads from both the WT Fielder and CRISPR *Tazip4-*  
364 *B2* mutant, using the repetitive probes 4P6 (Zhang *et al.*, 2004) and pTa71 (Gerlach and  
365 Bedbrook, 1979), in order to assess the level of mis-segregation and to ascertain whether  
366 specific chromosomes were involved in MN formation. Probe 4P6 labels seven interstitial sites

367 on D genome metaphase I chromosomes, while pTa71 labels the NOR (Nucleolar Organiser  
368 Region) on the 1BS, 6BS and 5DS metaphase I chromosomes. A 4P6 signal was observed in  
369 23.8% MNs, confirming a D genome chromosome origin, and a pTa71 signal in 17.5 %MNs,  
370 indicating that some chromosomes were carrying a NOR. This suggests that MN formation did  
371 not result from a single specific pair of homologues being univalent at metaphase I, but rather  
372 from different pairs of homologues being univalent in individual meiocytes. Morrison (1953)  
373 observed that univalents at metaphase I lagged at anaphase I, and then formed MN at the  
374 dyad stage. Such MNs were then maintained until the tetrad stage, when they were lost with  
375 the separation of the four microspores. Morrison (1953) also observed a direct correlation  
376 between numbers of univalents at metaphase I and percentage of tetrads with MN. As such,  
377 our observations are consistent with those of Morrison (1953), in that 56% of *Tazip4-B2*  
378 mutant meiocytes exhibited abnormalities at metaphase I, while 50% of tetrads subsequently  
379 possessed MN.

380

### 381 **Effect of the *Tazip4-B2* deletion on wheat grain number per spike (grain setting)**

382 The presence of MN in 50% tetrads suggested unbalanced microspores, which could also  
383 affect grain set. Two experiments (CER and glasshouse) were therefore conducted to assess  
384 the effect of deleting *Tazip4-B2* on grain set. In these experiments, grain setting analysis was  
385 performed on both the CRISPR *Tazip4-B2* mutant and the *ph1b* hexaploid wheat mutant  
386 carrying the 59.3Mb deletion covering *Tazip4-5B*. Spikelet number was recorded, as well as  
387 number of grains per spike for the first three spikes from each mutant and their  
388 corresponding WTs. The normalized grain number per spike was used to compare genotypes.  
389 Both CER and glasshouse experiments confirmed significantly reduced seed set in both  
390 *Tazip4-B2* mutants compared to the corresponding WT ( $P<0.01$ ) (Fig. 4a; Table 2). Under CER  
391 conditions, the grain number per spike was reduced by 36% in the CRISPR *Tazip4-B2*  
392 compared to the WT Fielder, and by 42% in the *ph1b* mutant compared to the Chinese Spring  
393 WT. Under glasshouse conditions, the grain number per spike was reduced by 44% in the  
394 CRISPR *Tazip4-B2* and 43% in the *ph1b* mutant, compared to their corresponding WTs. There  
395 was no significant difference between the CER and glasshouse growth conditions on grain  
396 settings for each genotype (Table 2; Table S3). Thus, the CRISPR deletion of *TaZIP4-B2* in  
397 hexaploid wheat resulted in 56% of meiocytes exhibiting meiotic abnormalities, 50% of  
398 tetrads exhibiting micronuclei, and up to 44% reduction in grain set. Similarly, the *ph1b*  
399 mutant also exhibited 56% meiocytes with meiotic abnormalities and up to 43% reduction in  
400 grain set.

401

### 402 **Pollen contributes to the *Tazip4-B2* effect on grain setting**

403 As previously described, on the female side, only one of the 4 megaspores develops into the  
404 embryo sac, with the 3 remaining megaspores degenerating following the tetrad stage. This  
405 contrasts with the male side, where all four products of meiosis survive to go through pollen  
406 development. It is possible that on the female side, some of the unbalanced megaspores are  
407 aborted, so that the near 50% reduction in grain set in the CRISPR *Tazip4-B2* mutant mostly

408 results from pollination with less viable pollen. An emasculation/pollination experiment was  
409 therefore conducted, using the CRISPR *Tazip4-B2* mutant and its corresponding WT. The  
410 experiment involved pollinating WT plants with WT or *Tazip4-B2* mutant pollen, or the *Tazip4-*  
411 *B2* mutant with WT pollen. Results showed that the lowest percentage of grain number per  
412 spike occurred when WT plants were pollinated with CRISPR *Tazip4-B2* mutant pollen (Fig.  
413 4b; Table S4), and that this grain set was significantly lower than that produced by pollinating  
414 WT plants with WT pollen (37.8% difference;  $P < 0.01$ ) (Fig. 4b). In contrast, when the *Tazip4-*  
415 *B2* mutant was pollinated with WT pollen, the reduction in grain set was not significantly  
416 different to when WT plants were pollinated with WT pollen (Table S4). These results show  
417 that most of the reduced grain number in the CRISPR *Tazip4-B2* mutant may be due to its  
418 being pollinated with less viable pollen, rather than it all being due to impaired female  
419 gametogenesis. Thus, meiotic abnormalities associated with *TaZIP4-B2* deletion may have a  
420 greater subsequent effect on male gametogenesis than on female gametogenesis.

421  
422 The maternal and paternal effects of *TaZIP4-B2* on seed embryo development were assessed  
423 by germinating the resulting seeds from each of the above pollination experiments.  
424 Germination rates from each of the pollination experiments were not significantly different  
425 (Fig. 4c; Table S5). Thus there was no apparent negative effect of the CRISPR *Tazip4-B2*  
426 mutation on the germination of seed derived from WT plants pollinated with *Tazip4-B2*  
427 mutant pollen, or from *Tazip4-B2* mutants pollinated with WT pollen.

#### 428 429 **A new pollen profiling approach reveals 50% *Tazip4-B2* mutant pollen is small**

430 Meiotic abnormalities in 56% meiocytes lead to mis-segregation of chromosomes and 50%  
431 tetrads with micronuclei. The *Tazip4-B2* mutant has up to a 44% reduction in grain number.  
432 The emasculation and pollination experiment suggests that most of this effect is the result of  
433 reduced pollen viability. We therefore developed a new pollen profiling approach in order to  
434 facilitate the study of any effect of the CRISPR *Tazip4-B2* mutant on wheat pollen size and  
435 number. The method was validated using pollen samples from five different wheat varieties,  
436 namely Cadenza, Fielder and Paragon (hexaploid), Cappelli and Kronos (tetraploid) and one  
437 hexaploid wheat landrace (Chinese Spring). Fully mature anthers were collected from the  
438 middle portion of the first ear of each plant, just before opening and pollen shedding, and  
439 stored in 70% ethanol. The samples could be stored in ethanol for a long period before  
440 analysis, without significant effect on pollen measurement accuracy. Pollen profiles of anther  
441 samples in 70% ethanol from the same genotype after different storage periods (of up to one  
442 month) are shown in Fig. S1. Sonication was used to ensure that all pollen grains were  
443 released from anthers, ensuring accurate measurement of pollen number per anther. Pollen  
444 size measurements from the six wheat varieties showed that the average pollen size in the  
445 hexaploid wheats was  $49.0 \pm 0.4 \mu\text{m}$ , (ranging from  $48.6 \pm 1.2 \mu\text{m}$  to  $49.5 \pm 1.1 \mu\text{m}$  in Chinese  
446 Spring and Paragon respectively), while in the tetraploid wheats it was  $44.6 \pm 0.2 \mu\text{m}$  ( $44.8 \pm 1.4$   
447  $\mu\text{m}$  and  $44.4 \pm 1.4 \mu\text{m}$  in Cappelli and Kronos respectively) (Table 3; Table S6), in keeping with

448 previously reported wheat pollen sizes (Cetl, 1960; Saps, 2021)). Pollen profiles of the  
449 hexaploid and tetraploid wheat varieties are shown in Fig. 5a.

450

451 Pollen number per anther varied between different wheat varieties (Fig. 5b). The average  
452 number of pollen grains per anther was  $2709 \pm 614$  (ranging from  $1973 \pm 272$  in Fielder to  
453  $3515 \pm 260$  in Cappelli) (Table 3). There was no correlation between number of pollen grains  
454 and polyploidy level, as there were no significant differences between hexaploid wheats  
455 (Cadenza and Paragon) and tetraploid wheats (Kronos and Cappelli) (Table S6). Nevertheless,  
456 pollen numbers were in keeping with those reported in a previous study (De Vries, 1974).

457 The pollen profiling method allowed us to compare pollen grain size distribution and pollen  
458 number from three different *Tazip4-B2* mutants with the relevant WT controls. Pollen was  
459 collected from full mature anthers (just before opening) for each of the *Tazip4-B2* mutants  
460 (CRISPR *Tazip4-B2*; *ph1b* hexaploid wheat mutant carrying a 59.3Mb chromosome 5B deletion  
461 covering *TaZIP4-B2*; *ph1c* tetraploid mutant carrying a large deletion of chromosome 5B  
462 covering *TaZIP4-B2*) and their WTs (*T. aestivum* cv. Chinese Spring; *T. turgidum* subsp. *Durum*  
463 cv. Senatore Cappelli (Giorgi, 1983); *T. aestivum* cv. Fielder respectively). Ten to twelve  
464 biological replicates for each of the six genotypes were included in this experiment. Pollen  
465 grain size and number were measured from five samples of each biological replicate using the  
466 Coulter counter Multisizer 4e. In this study, a mean of  $10,948 \pm 2063$  pollen grains were  
467 measured from each genotype (average  $1121 \pm 208$  pollen grains per plant) (Table 4). The  
468 three *Tazip4-B2* mutants showed a consistent and similar pollen profile comprising of two  
469 distinct peaks. The first peak represents pollen grains with grain size distribution similar to  
470 WT pollen and the second a group of pollen grains with smaller grain size (Fig. 6a).  
471 Accordingly, there were significant differences between the mean pollen grain size of each of  
472 the mutants *ph1b*, *ph1c* and CRISPR *Tazip4-B2* and their corresponding WTs ( $P < 0.01$ ) (Table  
473 4). More than 48% of pollen grains in the CRISPR *Tazip4-B2* hexaploid mutant samples were  
474 smaller in size ( $\leq 42 \mu\text{m}$ ). A similar percentage of small pollen grains (47%) was found in the  
475 *ph1b* hexaploid mutant samples. However, small pollen grains ( $\leq 38 \mu\text{m}$ ) were found in a lower  
476 percentage (34%) in the *ph1c* tetraploid mutant samples (Fig. 6b). The mean pollen number  
477 per anther ranged from  $2317 \pm 333$  to  $3713 \pm 497$  in the CRISPR *Tazip4-B2* and *ph1c* mutants  
478 respectively (Fig. 6c). However, no significant differences were observed between any of the  
479 *Tazip4-B2* mutants and their WT controls (Table 4). Detailed datasets of pollen size, pollen  
480 number per anther and percentage of small pollen grains for each *TaZIP4-B2* mutant and its  
481 respective wild type can be found in Table S7.

482

483 Viability of pollen from the CRISPR *Tazip4-B2*, and *ph1b* hexaploid mutants, as well as the  
484 *ph1c* tetraploid mutant, was assessed using Alexander staining. More than 3000 pollen grains  
485 were scored for each genotype (from three biological replicates) after Alexander staining and  
486 image acquisition. Pollen coloured dark magenta after treatment with Alexander stain was  
487 considered viable, whereas light blue-green stained pollen was considered unviable (Fig. 7a).  
488 Analysis revealed similar percentages of unviable pollen grains in all *Tazip4-B2* mutants (Fig.

489 7c), with 28% in the CRISPR-*Tazip4-B2* mutant, 25.8% in the *ph1b* mutant and 22.8% in the  
490 *ph1c* mutant pollen being unviable (Table S8). In all cases, the level of unviable pollen grains  
491 in the mutants was significantly higher than that in the WTs ( $P<0.01$ ), which did not exceed  
492 3.3% on average. Developmental pollen stages were also assessed in the *TaZIP4-B2* mutants.  
493 Pollen grains from fully mature anthers from the Fielder mutant CRISPR *Tazip4-B2* and the  
494 WT Fielder were stained selectively for DNA using Feulgen stain. Results from the WT showed  
495 normal trinucleate pollen grains, whereas about half of the pollen grains in the mutant were  
496 immature and/or abnormal (Fig. 7b). Thus, the pollen profiling analysis revealed that around  
497 half the pollen from the CRISPR *Tazip4-B2* and *ph1b* hexaploid wheat mutants had similar  
498 pollen profiles, with around half the pollen grains being abnormally small. The Alexander and  
499 Feulgen staining methods provided further information revealing that the small pollen grains  
500 in the CRISPR *Tazip4-B2* and *ph1b* mutants are a mixture of both immature (unfunctional) and  
501 unviable pollen grains.

502

503

504

## 505 Discussion

506

507 Most polyploid literature highlights the requirement for a new polyploid to ensure the  
508 production of balanced gametes and hence fertility, through both meiotic and genomic  
509 adaptations (Comai, 2005; Otto, 2007; Pelé *et al.*, 2018; Feliner *et al.*, 2020). However, few  
510 meiotic adaptations have been characterised, which is surprising given their suggested  
511 importance to the preservation of overall polyploid fertility. Recent studies have implicated  
512 at least eight different autotetraploid *Arabidopsis* meiotic genes in the meiotic  
513 stabilisation process (Yant *et al.*, 2013), with specific alleles in one of these genes, *ASY3*, being  
514 highlighted in two further studies (Morgan *et al.*, 2020; Seear *et al.*, 2020). Allopolyploid  
515 Brassica studies have also reported a number of loci exhibiting natural variation in their ability  
516 to affect homoeologous pairing and crossover (Jenczewski *et al.*, 2003; Liu *et al.*, 2006; Higgins  
517 *et al.*, 2020). Thus, these studies assessed the effects of natural gene variation on the meiotic  
518 process.

519

520 In the present study, we have assessed the stabilising effects of the meiotic gene *TaZIP4-B2*,  
521 which arose on chromosome 5B during wheat polyploidisation through duplication from 3B  
522 (Rey *et al.*, 2017; Rey *et al.*, 2018a; International Wheat Genome Sequencing Consortium,  
523 2018). Results indicate that the deletion of the duplicated *TaZIP4-B2* copy (through CRISPR  
524 deletion of *Tazip4-B2*) results in 56% of meiocytes exhibiting meiotic abnormalities at  
525 metaphase I (Fig. 2; Fig. 3a, b); chromosome mis-segregation at anaphase I (Fig. 3c, d, e, f);  
526 50% of tetrads possessing micronuclei (Fig. 3g, h, i, j); and finally, 48% of pollen grains being  
527 small (a mixture of immature and unviable) (Fig. 6; Fig. 7). A similar level of disruption is also  
528 observed in a hexaploid mutant (*ph1b*) carrying a 59.3Mb deletion encompassing *TaZIP4-B2*,  
529 with 56% of meiocytes exhibiting meiotic abnormalities (Fig. 2) and 47% of pollen grains being



530 small (Fig. 6). Results suggest a direct correlation between meiotic abnormalities observed at  
531 metaphase I and pollen fertility. Importantly, there was also up to a 44% reduction in grain  
532 set in the CRISPR *Tazip4-B2* mutant (43% reduction in the *ph1b* mutant) (Fig. 4a). A  
533 considerable part of this reduction in grain set is likely to be due to pollination with  
534 immature/unviable pollen (Fig. 4b), rather than being mainly due to disruption in female  
535 gametogenesis. Pollen deposition and pollen grain size can have an effect on pollen  
536 competition for the ovule (Cruden & Miller-Ward, 1981; Németh & Smith-Huerta, 2003).  
537 However, it is still unclear how, within the 50:50 mixture of WT and immature/unviable  
538 pollen, WT pollen does not compete more effectively during pollination.

539

540 Development of *in situ* approaches are required to study the effect of *Tazip4-B2* on the female  
541 meiotic and post-meiotic stages. It will be particularly important to study the tetrad stage  
542 where only one megaspore survives (Morrison, 1953), to identify any preferential abortion of  
543 megaspores with unbalanced chromosome numbers resulting from disruption of meiotic  
544 pairing and crossover. However, whatever the importance of *Tazip4-B2* for female  
545 gametogenesis, the presence of *TaZIP4-B2* is still required to ensure nearly half the grain set  
546 in hexaploid wheat. This confirms the great importance and impact of the *ZIP4* duplication  
547 event on the fertility of this major global polyploid crop.

548

549 *ZIP4* is a meiotic protein shown to be required for 85% of homologous crossovers during  
550 meiosis in *Arabidopsis* (Chelysheva *et al.*, 2007) and rice (Shen *et al.*, 2012). In polyploid  
551 wheat, the presence of *TaZIP4-B2* promotes homologous pairing, synapsis and crossover, and  
552 suppresses homoeologous crossover (Fig. 2) (Rey *et al.*, 2018a). The deletion of *TaZIP4-B2*  
553 reduces homologous crossover (Rey *et al.*, 2018a), contributing to an increase in meiotic  
554 abnormalities at metaphase I. The fact that the presence of *TaZIP4-B2* increases homologous  
555 crossover, suggests that the *ZIP4* effect on homologous crossover may be dosage dependent.  
556 This contrasts with the effect of other meiotic genes analysed in polyploid Brassica and wheat,  
557 where the loss of such genes does not reduce homologous crossover, but homologous  
558 crossover is only affected when all copies are deleted (Gonzalo *et al.*, 2019; Desjardins *et al.*,  
559 2020). Thus, *ZIP4* was an effective target for divergence on polyploidisation, as its  
560 homologous crossover activity appears to be dosage dependent.

561

562 Although, *ZIP4* studies in *Arabidopsis* and rice have not shown a role for *ZIP4* in pairing and/or  
563 synapsis in these species, *ZIP4* is required for pairing and synapsis as well as homologous  
564 crossover in *Sordaria* (Dubois *et al.*, 2019) and budding yeast (Tsubouchi *et al.*, 2006).  
565 However, no *ZIP4* study in any other species has shown that it suppresses homoeologous  
566 crossover. This raises the question of how the duplicated *TaZIP4-B2* copy suppresses  
567 homoeologous crossover in wheat, and how it promotes homologous pairing, synapsis and  
568 crossover, preserving pollen viability and grain set. The early and 3-fold increased expression  
569 of *TaZIP4-B2* compared to the group 3 *ZIP4s*, is also likely to ensure that it competes with  
570 them for loading onto meiotic chromosomes (Rey *et al.*, 2017). The present study reveals that

571 up to half of the wheat ZIP4 protein is composed of TPRs (Fig. 1b, c). The presence of TPRs  
572 in other proteins has been shown to enable these proteins to form alpha solenoid helix  
573 structures (Blatch & Lasse, 1999; D'Andrea & Regan, 2003).

574

575 Previous studies have suggested that the *ph1b* deletion effect on homoeologous crossover in  
576 wheat is linked to the improved ability of the meiotic crossover protein MLH1 to process  
577 crossovers (Martín *et al.*, 2014), while the *ph1b* deletion effect on chromosome pairing in  
578 wheat itself reported by Roberts *et al.*, (1999) is linked to the chromosome axis protein, ASY1  
579 (Boden *et al.*, 2009). Recent studies in budding yeast have revealed that ZIP4 is connected to  
580 MLH1 through the binding of MER3, to ASY1 through the binding of another chromosome  
581 axis protein ASY3, and to synapsis proteins through ZIP2 (Pyatnitskaya *et al.*, 2019). So,  
582 although *ZIP4* has not previously been shown to regulate homoeologous crossover in any  
583 species, or chromosome pairing and synapsis in plants, its interactions with axis and crossover  
584 proteins may provide a basis for these effects in wheat. Thus, the simplest explanation for the  
585 ability of *TaZIP4-B2* to promote homologous pairing and suppress homoeologous crossover,  
586 is that they result from a reduction in the normal functions of group 3 *ZIP4s*, as a consequence  
587 of the TPR divergence within *TaZIP4-B2* from that within *TaZIP4-B1* (Fig. 1b, c). The wheat  
588 group 3 *ZIP4s* are likely to process 85% of homologous crossovers as in other species  
589 (Chelysheva *et al.*, 2007; Shen *et al.*, 2012). They are also likely to process homoeologous  
590 crossover activity, given the level of crossover observed in wheat haploids lacking *TaZIP4-B2*  
591 (Jauhar *et al.*, 1999). In contrast, although the diverged *TaZIP4-B2* copy has some  
592 homologous crossover activity, it does not possess any homoeologous crossover activity (Rey  
593 *et al.*, 2018a). Sordaria studies reveal that the initial chromosome interactions involve ZIP4  
594 foci on homologous chromosomes (Dubois *et al.*, 2019). Thus, if wheat group 3 *ZIP4s* can  
595 process homologous and homoeologous crossovers, it is likely that foci of these ZIP4s can  
596 form stable interactions between both homologues and homoeologues. Again, the diverged  
597 *TaZIP4-B2* now only promotes homologous pairing or stable homologous interactions (Martín  
598 *et al.*, 2018; Rey *et al.*, 2018a).

599

600 Given the importance of the *TaZIP4-B2* function for preserving grain number in wheat, future  
601 studies will need to confirm that the phenotype of *TaZIP4-B2* results from a reduction in the  
602 function activities possessed by the group 3 *ZIP4s*. Such studies will also need to confirm  
603 whether different *TaZIP4 B2* alleles exhibit variable phenotypes sensitive to temperature  
604 change. Natural variation in the meiotic phenotypes has been reported for some meiotic  
605 genes in other polyploids (Jenczewski *et al.*, 2003; Liu *et al.*, 2006; Yant *et al.*, 2013; Morgan  
606 *et al.*, 2020; Seear *et al.*, 2020; Higgins *et al.*, 2020).

607

608 The new approach for analysing pollen presented in this study can be used in future *TaZIP4-*  
609 *B2* studies to screen landrace diversity mapping populations (Wingen *et al.*, 2017), carrying  
610 different *TaZIP4-B2* alleles for variable phenotypes, with variable sensitivity to temperature.  
611 This approach is high throughput and sensitive, with the capability to screen 1000s of pollen

612 grains rapidly. Thus, the approach can be used for forward and reverse meiotic genetic  
613 screenings. In the present study, the technique was used to analyse pollen derived from both  
614 tetraploid and hexaploid meiotic mutants, revealing the presence of small pollen (Fig. 6a, b).  
615 The recent availability of multiple sequenced wheat genomes has allowed the initial  
616 identification of haplotype blocks (Brinton *et al.*, 2020), revealing different *TaZIP4-B2*  
617 haplotypes. This information, combined with the availability of landrace diversity mapping  
618 populations (Wingen *et al.*, 2017) and the pollen technique, can be used to rapidly identify  
619 any potential natural phenotype variation correlating with a specific *TaZIP4-B2* haplotype, as  
620 well as to explore the stability of such phenotypes under variable temperatures. This will be  
621 important for studies exploring the effects of temperature increases on wheat yields within  
622 the context of global climate change.

623

#### 624 **Acknowledgements**

625 This work was supported by the UKRI- Biological and Biotechnology Research Council (BBSRC)  
626 through a grant as part of the 'Designing Future Wheat' (DFW) Institute Strategic Programme  
627 (BB/ P016855/1) and Response Mode Grant (BB/R0077233/1).

628

#### 629 **Author Contributions**

630 AKA developed the pollen analysis and applied it to study the *Tazip4-B2* mutants. AKA  
631 undertook the grain set experiment; emasculation/pollination experiment, and their analysis,  
632 producing the figures and tables for all this data. AM carried out the cytological and  
633 immunolocalisation experiments and produced the immunolocalisation figure. GM carried  
634 out the *TaZIP4* protein analysis, and AKA the sequence alignments producing the resulting  
635 figure. GM provided thoughts and guidance and revised and edited the manuscript produced  
636 by AKA and AM.

#### 637 **References**

638 **Adams KL, Wendel JF. 2005.** Novel patterns of gene expression in polyploid plants. *Trends in*  
639 *Genetics* **21**: 539-543.

640 **Alabdullah AK, Borrill P, AC, Ramirez-Gonzalez RH, Uauy C, Shaw P, Moore G. 2019.** A co-  
641 expression network in hexaploid wheat reveals mostly balanced expression and lack of  
642 significant gene loss of homeologous meiotic genes upon polyploidization. *Frontiers in Plant*  
643 *Science* **10**: 1325 (doi: 10.3389/fpls.2019.01325).

644

645 **Alexander MP. 1969.** Differential Staining of Aborted and Nonaborted Pollen. *Stain*  
646 *Technology* **44**: 117-122.

647

- 648 **Al-Kaff N, Knight E, Bertin I, Foote T, Hart N, Griffiths S, Moore G. 2008.** Detailed dissection  
649 of the chromosomal region containing the *Ph1* locus in wheat *Triticum aestivum*: with  
650 deletion mutants and expression profiling. *Annual Botany* **105**: 863-872.  
651
- 652 **Blatch GL, Lassel M. 1999.** The tetratricopeptide repeat: a structural motif mediating protein-  
653 protein interactions. *Bioessays* **21**: 932-939.  
654
- 655 **Boden SA, Langridge P, Spangenberg G, Able J. 2009.** TaASY1 promotes homologous  
656 chromosome interactions and is affected by deletion of *Ph1*. *Plant Journal* **57**: 487-487.  
657
- 658 **Brinton J, Ramirez-Gonzalez RH, Simmonds J, Wingen L, Orford S, Griffiths S, 10 Wheat  
659 Genome Project, Haberer G, Spannagl M, Walkowiak S, Pozniak C, Uauy C. 2020.** Haplotype-  
660 led approach to increase the precision of wheat breeding. *Communications Biology* **3**: 712  
661 (doi.org/10.1038/s42003-020-01413-2).  
662
- 663 **Cetl I. 1960.** The size of pollen grain of the genus *Triticum* L. *Biologia Plantarum*. **2**: 287-291.  
664 DOI : 10.1007/BF02920668
- 665
- 666 **Chelysheva L, Gendrot G, Vezon D, Doutriaux M-P, Mercier R, Grelon M. 2007.** *Zip4/Spo22*  
667 *is required for Class I CO formation but not for synapsis completion in Arabidopsis thaliana.*  
668 *PLoS Genetics* **3**: e83 (doi: 10.1371/journal.pgen.0030083).  
669
- 670 **Comai L. 2005.** The advantages and disadvantages of being polyploid. *Nature Reviews*  
671 *Genetics* **6**: 838-846.  
672
- 673 **Cruden RW, Miller-Ward S. 1981.** Pollen-ovule ratio, pollen size, and the ratio of stigmatic area  
674 to the pollen-bearing area of the pollinator: An hypothesis. *Evolution*, **35**: 964-  
675 974. <https://doi.org/10.1111/j.1558-5646.1981.tb04962.x>  
676
- 677 **D'Andrea LD, Regan L. 2003.** TPR proteins: the versatile helix. *Trends in Biochemical Sciences*  
678 **28**: 655-662.
- 679
- 679 **Delorenzi M, Speed T. 2002.** An HMM model for coiled-coil domains and a comparison with  
680 PSSM-based predictions. *Bioinformatics* **18**: 617-625.
- 681
- 681 **Desjardins SD, Ogle DE, Ayoub MA, Heckman S, Henderson IR, Edwards KJ, Higgins JD. 2020.**  
682 *MutS homologue 4 and MutS homologue 5 maintain the Obligate Crossover Despite Stepwise*  
683 *Gene Loss Following Polyploidisation.* *Plant Physiology* **183**: 1545-1558.
- 684
- 684 **De Vries, A. 1974.** Some aspects of cross-pollination in wheat (*Triticum aestivum* L.). 3.  
685 Anther length and number of pollen grains per anther. *Euphytica* **23**: 11-19.

- 686 **Dewitte A, Eeckhaut T, Van Huylenbroeck J, Van Bockstaele E. 2010.** Meiotic aberrations  
687 during 2n pollen formation in Begonia. *Heredity* **104**: 215–23.
- 688 **Dubois E, Muyt AD, Soyer JL, Budin K, Legras M, Piolot T, Debuchy R, Kleckner N, Zickler D,**  
689 **Espagne E. 2019.** *Building bridges to move recombination complexes. Proceedings of National*  
690 *Academy of Sciences USA* **116**: 12400-12409.
- 691
- 692 **Feliner GN, Casacuberta J, Wendel JC. 2020.** Genomics of Evolutionary Novelty in Hybrids and  
693 Polyploids. *Frontiers in Genetics* **11** 792. [https://doi: 10.3389/fgene.2020.00792](https://doi.org/10.3389/fgene.2020.00792)
- 694 **Food and Agriculture Organization of the United Nations. 2017.** FAOSTAT statistics database,  
695 Crops (2017); ([www.fao.org/faostat/en/#data/QC](http://www.fao.org/faostat/en/#data/QC)).
- 696 **Gerlach WL, Bedbrook JR. 1979.** Cloning and characterisation of ribosomal RNA genes from  
697 wheat and barley. *Nucleic Acids Research* **11**: 1869-1885.
- 698 **Giorgi B. 1983.** Origin, behaviour and utilization of a *Ph1* mutant of durum wheat, *Triticum*  
699 *turgidum* (L.) var. durum. *Proceedings of the 6th International Wheat Genetics*  
700 *Symposium* 1033-1040.
- 701 **Gonzalo A, Lucas M-O, Charpentier C, Sandmann G, Lloyd A, Jenczewski E. 2019.** Reducing  
702 MSH4 copy number prevents meiotic crossovers between non-homologous chromosomes in  
703 *Brassica napus*. *Nature Communications* **10**: 2354. ([doi.org/10.1038/s41467-019-10010-9](https://doi.org/10.1038/s41467-019-10010-9)).
- 704
- 705 **Griffiths S, Sharp R, Foote TN, Bertin I, Wanous M, Reader S, Colas I, Moore G. 2006.**  
706 Molecular characterization of *Ph1* as a major chromosome pairing locus in polyploid wheat.  
707 *Nature* **439**: 749-752.
- 708 **Higgins DG & Sharp PM. 1988.** CLUSTAL: a package for performing multiple sequence  
709 alignment on a microcomputer. *Gene* **73**:237-244.
- 710 **Higgins EE, Howell EC, Armstrong SJ, Parkin IAP. 2020.** A major quantitative trait locus on  
711 chromosome A9, *BnaPh1* controls homoeologous recombination in *Brassica napus*. *New*  
712 *Phytologist* ([doi.org/10.1111/nph.16986](https://doi.org/10.1111/nph.16986)).
- 713
- 714 **International Wheat Genome Sequencing Consortium (IWGSC). 2018.** Shifting the limiting in  
715 wheat research and breeding using a fully annotated reference genome. *Science* **362**:  
716 eaar7191 ([doi.org/10.1126/science.aa7191](https://doi.org/10.1126/science.aa7191)).
- 717 **Jampates R, Dvorak J. 1986.** Location of the *Ph1* locus in the metaphase chromosome map  
718 and the linkage map of the 5Bq arm of wheat. *Canadian Journal of Genetics and*  
719 *Cytology* **28**:511-519.



- 720 **Jauhar PP, Almousiem AB, Peterson TS, Joppa LR. 1999.** Inter- and Intragenomic  
721 chromosome pairing in Haploids of Durum Wheat. *Journal of Heredity*. **90**: 437-445.
- 722 **Jenczewski E, Eber F, Grimaud A, Huet S, Lucas MO, Monod H, Chevre AM. 2003.** *PrBn*, a  
723 major gene controlling homeologous pairing in oilseed rape (*Brassica napus*) haploids.  
724 *Genetics* **164**: 645–653.
- 725 **Jiang Y, Ding C, Yue H, Yang R. 2011.** Meiotic behaviour and pollen fertility of five species in  
726 the genus *Epimedium*. *African Journal of Biotechnology* **10**:16189–16192.
- 727 **Kaur D, Singhal VK. 2019.** Meiotic abnormalities affect genetic constitution and pollen  
728 viability in dicots from Indian cold deserts. *BMC Plant Biology* **19**:10.  
729 (doi.org/10.1186/s12870-018-1596-7).
- 730 **Kumar P, Singhal VK, Kaur D, Kaur S. 2010.** Cytomixis and associated meiotic abnormalities  
731 affecting pollen fertility in *Clematis orientalis*. *Biologia Plantarum* **54**:181–184.
- 732 **Larkin MA, Blackshields G, Brown NP, Chenna R, McGettigan PA, McWilliam H, Valentin F,  
733 Wallace IM, Wilm A, Lopez R, Thompson JD, Gibson TJ, Higgins DG. 2007.** Clustal W and  
734 Clustal X version 2.0. *Bioinformatics* **23**:2947-2948.
- 735 **Liu Z, Adamczyk K, Manzanares-Dauleux M, Eber F, Lucas MO, Delourme R, Chevre AM,  
736 Jenczewski E. 2006.** Mapping *PrBn* and other quantitative trait loci responsible for the control  
737 of homeologous chromosome pairing in oilseed rape (*Brassica napus* L.) haploids. *Genetics*  
738 **174**: 1583–1596.
- 739 **Magis C, Taly JF, Bussotti G, Chang JM, Di Tommaso P, Erb I, Espinosa-Carrasco J, Notredame  
740 C. 2014.** T-Coffee: Tree-based consistency objective function for alignment  
741 evaluation. *Methods in Molecular Biology* **1079**:117-129.
- 742 **Martín AC, Borrill P, Higgins J, Alabdullah AK, Ramírez-González RH, Swarbeck D, Uauy C,  
743 Shaw P, Moore G. 2018.** Overall wheat transcription during early meiosis is independent of  
744 synapsis, ploidy level and the *Ph1* locus. *Frontiers in Plant Science* **9**: 1791 doi:  
745 10.3389/fpls.2018.01791.
- 746
- 747 **Martín AC, Rey M-D, Shaw P, Moore G. 2017.** Dual effect of the wheat *Ph1* locus on  
748 chromosome synapsis and crossover. *Chromosoma* **126**: 669–680.
- 749
- 750 **Martín AC, Shaw P, Phillips D, Reader S, Moore G. 2014.** Licensing MLH1 sites for crossover  
751 during meiosis. *Nature Communications*. **5**, 1–5. doi: 10.1038/ncomms5580.
- 752 **Mason AS, Wendel JF. 2020.** Homoeologous Exchanges, Segmental Allopolyploidy, and  
753 Polyploid Genome Evolution. *Frontiers in Genetics* **11**:1014 (doi: 10.3389/fgene.2020.01014).

- 754 **Mitchell AL, Attwood TK, Babbitt PC, et al. 2019.** InterPro in 2019: improving coverage,  
755 classification and access to protein sequence annotations. *Nucleic Acids Research* **47**:D351-  
756 D360 (doi: 10.1093/nar/gky1100).
- 757 **Morgan C, Zhang H, Henry CE, Franklin CFH, Bomblies K. 2020.** Derived alleles of two axis  
758 proteins affect meiotic traits in autotetraploid *Arabidopsis arenosa*. *Proceeding of the*  
759 *National Academy of Sciences. U.S.A.* **117**: 8980–8988.
- 760 **Morrison JW. 1953.** Chromosome behaviour in wheat monosomics. *Heredity* **7**: 203-217.  
761
- 762 **Németh MB, Smith-Huerta NL. 2003.** Pollen Deposition, Pollen Tube Growth, Seed  
763 Production, and Seedling Performance in Natural Populations of *Clarkia Unguiculata*  
764 (*Onagraceae*). *International Journal of Plant Sciences*, **164**(1), 153-164. doi:10.1086/344549
- 765 **Osborn TC, J. Pires JC, Birchler JA, Donald L. Auger DL, Chen ZJ, Lee H-S, Comai L, Madlung**  
766 **A, Doerge RW, Colot V, and Martienssen RA. 2003.** Understanding mechanisms of novel gene  
767 expression in polyploids. *Trends in Genetics* **19**: 141–147 (doi:10.1016/S0168-9525(03)00015-  
768 5).
- 769 **Otto SP. 2007.** The evolutionary consequences of polyploidy. *Cell* **131**: 452-462.
- 770 **Pagliarini MS. 2000.** Meiotic behavior of economically important plant species: the  
771 relationship between fertility and male sterility. *Genetics and Molecular Biology* **23**:997–  
772 1002.
- 773 **Pelé A, Rousseau-Gueutin, Chevre A-M. 2018.** Speciation Success of polyploid plants closely  
774 relates to regulation of meiotic recombination. *Frontiers in Plant Science* **9**: 907  
775 (doi:10.3389/fpls.2018.00907).  
776
- 777 **Pyatnitskaya A, Borde V, Muylt AD. 2019.** Crossing and zipping: molecular duties of ZMM  
778 proteins in meiosis. *Chromosoma* **128**: 181-198.
- 779 **Ramírez-González RH, Borrill P, Lang D, Harrington SA, Brinton J, Venturini L, Davey M,**  
780 **Jacobs J, van Ex F, Pasha A, Khedikar Y, Robinson SJ, Cory AT, Florio T, Concia L, Juery C,**  
781 **Schoonbeek H, Steuernagel B, Xiang D, Ridout CJ, Chalhoub B, Mayer KFX, Benhamed M,**  
782 **Latrasse D, Bendahmane A, Wulff BBH, Appels R, Tiwari V, Datla R, Choulet F, Pozniak CJ,**  
783 **Provart NJ, Sharpe AG, Paux E, Spannagl M, Bräutigam A, Uauy C, International Wheat**  
784 **Genome Sequencing Consortium. 2018.** The transcriptional landscape of polyploid wheat.  
785 *Science* **361**: 662 e6089 (doi.org/10.1126/science.aar6089).

- 786 **Rey M-D, Martín AC, Higgins J, Swarbreck D, Uauy C, Shaw P, Moore G. 2017.** Exploiting the  
787 ZIP4 homologue within the wheat *Ph1* locus has identified two lines exhibiting homoeologous  
788 crossover in wheat-wild relative hybrids. *Molecular Breeding* **37**: 95.  
789
- 790 **Rey M-D, Martín AC, Smedley M, Hayta S, Harwood W, Shaw P, Moore G. 2018a.** Magnesium  
791 increases homoeologous crossover frequency during meiosis in *Tazip4-B2* (*Ph1* gene) mutant  
792 wheat-wild relative hybrids. *Frontiers in Plant Science* **9**: 509 (doi: 10.3389/fpls.2018.0050).
- 793 **Rey MD, Moore G, Martín AC. 2018b.** Identification and comparison of individual  
794 chromosomes of three accessions of *Hordeum chilense*, *Hordeum vulgare*, and *Triticum*  
795 *aestivum* by FISH. *Genome* **61**: 387-396.
- 796 **Riley R, Chapman V. 1958.** Genetic control of the cytological diploid behaviour of hexaploid  
797 wheat. *Nature* **182**: 713–715. (doi: 10.1038/182713a0).  
798
- 799 **Roberts MA, Reader S, Dalglish C, Miller T, Foote T, Fish LJ, Snape JW, Moore G. 1999.**  
800 Induction and characterization of *Ph1* wheat mutants. *Genetics* **153**: 1909-1918.  
801
- 802 **Saps. 2021.** Pollen Images In Size Order. [website] UTR  
803 <https://saps.org.uk/pollen/index2.htm>. [Accessed 20 January 2021].  
804
- 805 **Sears ER, Okamoto M. 1958.** Intergenomic chromosome relationships in hexaploid wheat.  
806 *Proceedings of 10th International Congress of Genetics* **2**: 258–259 (doi:  
807 10.1093/aob/mcm331).  
808
- 809 **Sears ER. 1977.** Induced mutant with homoeologous pairing in common wheat.  
810 *Canadian Journal of Genetics and Cytology* **19**: 585–593 (doi: 10.1139/g77-063).
- 811 **Seear PJ, France MJ, Gregory CL, Heavens D, Schmickl R, Yant L, Higgins JD. 2020.** A novel  
812 allele of ASY3 is associated with greater meiotic stability in autotetraploid *Arabidopsis lyrata*.  
813 *PLoS Genetics* **16**: e1008900 (doi.org/10.1371/journal.pgen.1008900).
- 814 **Sharma AK, Sharma A. 2014.** Chromosome Techniques: Theory and Practice. Michigan, IN:  
815 Butterworth-Heinemann.
- 816 **Sheidai M, Jafari S, Taleban P and Keshavarzi M. 2009.** Cytomixis and Unreduced Pollen  
817 Grain Formation in *Alopecurus* L. and *Catbrosa Beauv.* (Poaceae). *Cytologia*. **74**: 31–41.
- 818 **Sheidai M, Jafari S, Nourmohammadi Z, Beheshti S. 2010.** Cytomixis and unreduced pollen  
819 grain formation in six *Hordeum* species. *Gene Conserve*. **9**:40–50.

820 **Shen Y, Wang TK, Wang W, Huang J, Luo W, Luo Q, Hong LH, li M, Cheng Z. 2012.** ZIP4 in  
821 homologous chromosome synapsis and crossover formation in rice meiosis. *Journal of Cell*  
822 *Science* **125**: 2581-2591.

823 **Singhal VK, Kaur D. 2011.** Cytomixis Induced Meiotic Irregularities and Pollen Malformation  
824 in *Clematis graveolens* Lindley from the Cold Deserts of Kinnaur District of Himachal Pradesh  
825 (India). *Cytologia* **76**: 319–327.

826  
827 **Tsubouchi T, Zhao H, Roeder GS. 2006.** The meiosis-specific ZIP4 protein regulates crossover  
828 distribution by promoting synaptonemal complex formation together with  
829 ZIP2. *Developmental Cell* **10**: 809-819.

830  
831 **Wall AM, Riley R, Gale MD. 1971.** The position of a locus of chromosome 5B in *Triticum*  
832 *aestivum* affecting homoeologous meiotic pairing. *Genetical Research* **18**: 329-339.

833  
834 **Wingen LU, West, Leverington-Waite M, Collier S, Orford S, Goram R, Yang C-Y, King J, Allen**  
835 **AM, Burridge A, Edwards KJ, Griffiths S. 2017.** Wheat Landrace Genome Diversity. *Genetics*  
836 **205**: 1657-1676.

837  
838 **Yant Y, Hollister JD, Wright KM, Arnold BJ, Higgins JD, Franklin FCH, Bomblies K. 2013.**  
839 Meiotic adaption to genome duplication in *Arabidopsis arenosa*. *Current Biology* **23**:2151-  
840 2156.

841 **Zhang P, Li W, Fellers J, Friebe B, Gill BS. 2004.** BAC-FISH in wheat identifies chromosome  
842 landmarks consisting of different types of transposable elements. *Chromosoma* **112**:288–  
843 299.

844 **Zimmermann L, Stephens A, Nam SZ, Rau D, Kübler J, Lozajic M, Gabler F, Söding J, Lupas**  
845 **AN, Alva V. 2018.** A Completely Reimplemented MPI Bioinformatics Toolkit with a New  
846 HHpred Server at its Core. *Journal of Molecular Biology* **430**:2237-2243.

847

848

849 **Tables:**

850

851 **Table 1. Summary of the meiotic scores for the two *Tazip4-B2* mutants and the**  
 852 **corresponding wild types.**

| Genotype                | Univalents | Multivalents | Rod bivalents | Ring bivalents | Defective meiocytes* (%) | Reference                   |
|-------------------------|------------|--------------|---------------|----------------|--------------------------|-----------------------------|
| Fielder WT**            | 0.16±0.07  | 0±0          | 1.37±0.13     | 19.52±0.14     | 6.70                     | Rey <i>et al.</i> , 2018    |
| CRISPR <i>Tazip4-B2</i> | 1.16±0.12  | 0.39±0.05    | 4.93±0.15     | 14.84±0.19     | 56.00                    |                             |
| Chinese Spring          | 0±0        | 0±0          | 1±0.20        | 20±0.20        | 0.00                     | Martín <i>et al.</i> , 2014 |
| <i>ph1b</i>             | 0.80±0.19  | 0.53±0.12    | 4.73±0.26     | 14.83±0.33     | 56.60                    |                             |

853 \* Meiocytes with meiotic aberrations (univalents and multivalents) thus have incorrect chromosomes pairing.

854 \*\* This is a CRISPR transgenic Fielder without *TaZIP4-B2* knockout.

855

856

857 **Table 2. Mean Normalized grain number per spike for the two *Tazip4-B2* mutants and their**  
 858 **corresponding wild types under CER and glasshouse growth condition.** N is the number of  
 859 biological replicates per genotype. Mean values with standard deviation are shown.  
 860 Treatments with the same letter are not significantly different.

| Genotype                | Controlled Environment Room (CER) |                                   | Glasshouse |                                   |
|-------------------------|-----------------------------------|-----------------------------------|------------|-----------------------------------|
|                         | N                                 | Normalized grain number per spike | N          | Normalized grain number per spike |
| CRISPR <i>Tazip4-B2</i> | 5                                 | 50.2 ± 16.7 <sup>bcd</sup>        | 15         | 37.7±1.0 <sup>de</sup>            |
| cv. Fielder WT          | 12                                | 78.5±12.9 <sup>a</sup>            | 15         | 67.6±07.9 <sup>ab</sup>           |
| <i>ph1b</i>             | 15                                | 46.7±1.0 <sup>cd</sup>            | 11         | 43.8±08.6 <sup>cd</sup>           |
| cv. Chinese Spring WT   | 20                                | 80.9±17.3 <sup>a</sup>            | 15         | 77.3±08.8 <sup>a</sup>            |

861

862

863

864

865 **Table 3. Pollen number and pollen grain size for some hexaploid and tetraploid wheat**  
 866 **varieties.** Mean and median values with standard deviation are shown. Treatments with the  
 867 same letter are not significantly different.

| Polyploidy                     | Variety        | N  | Pollen size             |                         | Pollen number per anther |                       |
|--------------------------------|----------------|----|-------------------------|-------------------------|--------------------------|-----------------------|
|                                |                |    | Mean                    | Median                  | Mean                     | Median                |
| Hexaploid                      | Cadenza        | 10 | 49.05±1.28 <sup>a</sup> | 49.65±1.11 <sup>a</sup> | 2380±320 <sup>b</sup>    | 2407±348 <sup>b</sup> |
| Hexaploid                      | Chinese Spring | 12 | 48.58±1.17 <sup>a</sup> | 49.05±1.15 <sup>a</sup> | 2807±384 <sup>c</sup>    | 2840±408 <sup>c</sup> |
| Hexaploid                      | Fielder        | 10 | 48.67±0.98 <sup>a</sup> | 49.36±1.19 <sup>a</sup> | 1973±272 <sup>a</sup>    | 1686±250 <sup>a</sup> |
| Hexaploid                      | Paragon        | 10 | 49.51±1.09 <sup>a</sup> | 50.25±1.22 <sup>a</sup> | 3318±236 <sup>d</sup>    | 3293±339 <sup>d</sup> |
| Tetraploid                     | Cappelli       | 10 | 44.77±1.40 <sup>b</sup> | 44.85±1.48 <sup>b</sup> | 3515±260 <sup>d</sup>    | 3480±277 <sup>d</sup> |
| Tetraploid                     | Kronos         | 13 | 44.44±1.39 <sup>b</sup> | 44.63±1.52 <sup>b</sup> | 2260±110 <sup>b</sup>    | 2373±256 <sup>b</sup> |
| All hexaploid wheat varieties  |                | 4  | 48.95±0.43              | 49.58±0.51              | 2533±657                 | 2557±684              |
| All tetraploid wheat varieties |                | 2  | 44.61±0.23              | 44.74±0.15              | 2915±849                 | 2926±783              |

868

869



870

871 **Table 4. Pollen number and pollen grain size for the three *Tazip4-B2* mutants and their**  
 872 **corresponding wild types.** Mean and median values with standard deviation are shown.

873 Treatments with the same letter are not significantly different

| Genotype                | Total number of measured pollen grains | N  | Pollen grain size ( $\mu\text{m}$ ) |                             | Pollen number per anther    |                              | Small pollen grains (%)      |                              |
|-------------------------|----------------------------------------|----|-------------------------------------|-----------------------------|-----------------------------|------------------------------|------------------------------|------------------------------|
|                         |                                        |    | Mean                                | Median                      | Mean                        | Median                       | Mean                         | Median                       |
| <i>ph1b</i>             | 10100                                  | 12 | 42.3 $\pm$ 1.3 <sup>ab</sup>        | 43.2 $\pm$ 1.7 <sup>a</sup> | 2806 $\pm$ 426 <sup>a</sup> | 2817 $\pm$ 430 <sup>a</sup>  | 47.2 $\pm$ 6.9 <sup>a</sup>  | 45.1 $\pm$ 8.3 <sup>a</sup>  |
| cv. Chinese Spring      | 11072                                  | 12 | 47.4 $\pm$ 1.3 <sup>c</sup>         | 48.7 $\pm$ 1.5 <sup>b</sup> | 3076 $\pm$ 370 <sup>a</sup> | 3082 $\pm$ 364 <sup>a</sup>  | 15.0 $\pm$ 5.6 <sup>b</sup>  | 13.2 $\pm$ 2.5 <sup>b</sup>  |
| <i>ph1c</i>             | 11139                                  | 10 | 40.9 $\pm$ 1.9 <sup>b</sup>         | 42.4 $\pm$ 2.6 <sup>a</sup> | 3713 $\pm$ 497 <sup>c</sup> | 3681 $\pm$ 593 <sup>c</sup>  | 34.3 $\pm$ 8.2 <sup>c</sup>  | 34.4 $\pm$ 8.3 <sup>c</sup>  |
| cv. Cappelli            | 11840                                  | 10 | 43.7 $\pm$ 1.5 <sup>a</sup>         | 44.5 $\pm$ 1.5 <sup>a</sup> | 3947 $\pm$ 270 <sup>c</sup> | 3950 $\pm$ 248 <sup>c</sup>  | 11.1 $\pm$ 3.8 <sup>b</sup>  | 10.7 $\pm$ 4.0 <sup>b</sup>  |
| CRISPR <i>Tazip4-B2</i> | 13904                                  | 10 | 43.1 $\pm$ 2.1 <sup>a</sup>         | 43.4 $\pm$ 3 <sup>a</sup>   | 2317 $\pm$ 333 <sup>b</sup> | 2354 $\pm$ 379 <sup>ab</sup> | 48.5 $\pm$ 13.4 <sup>a</sup> | 48.6 $\pm$ 13.4 <sup>a</sup> |
| cv. Fielder             | 11313                                  | 10 | 47.3 $\pm$ 1.0 <sup>c</sup>         | 49.1 $\pm$ 1.2 <sup>b</sup> | 1886 $\pm$ 265 <sup>b</sup> | 1875 $\pm$ 231 <sup>b</sup>  | 17.9 $\pm$ 3.9 <sup>b</sup>  | 19.1 $\pm$ 6.3 <sup>b</sup>  |

874

875

876 **Figures:**

877

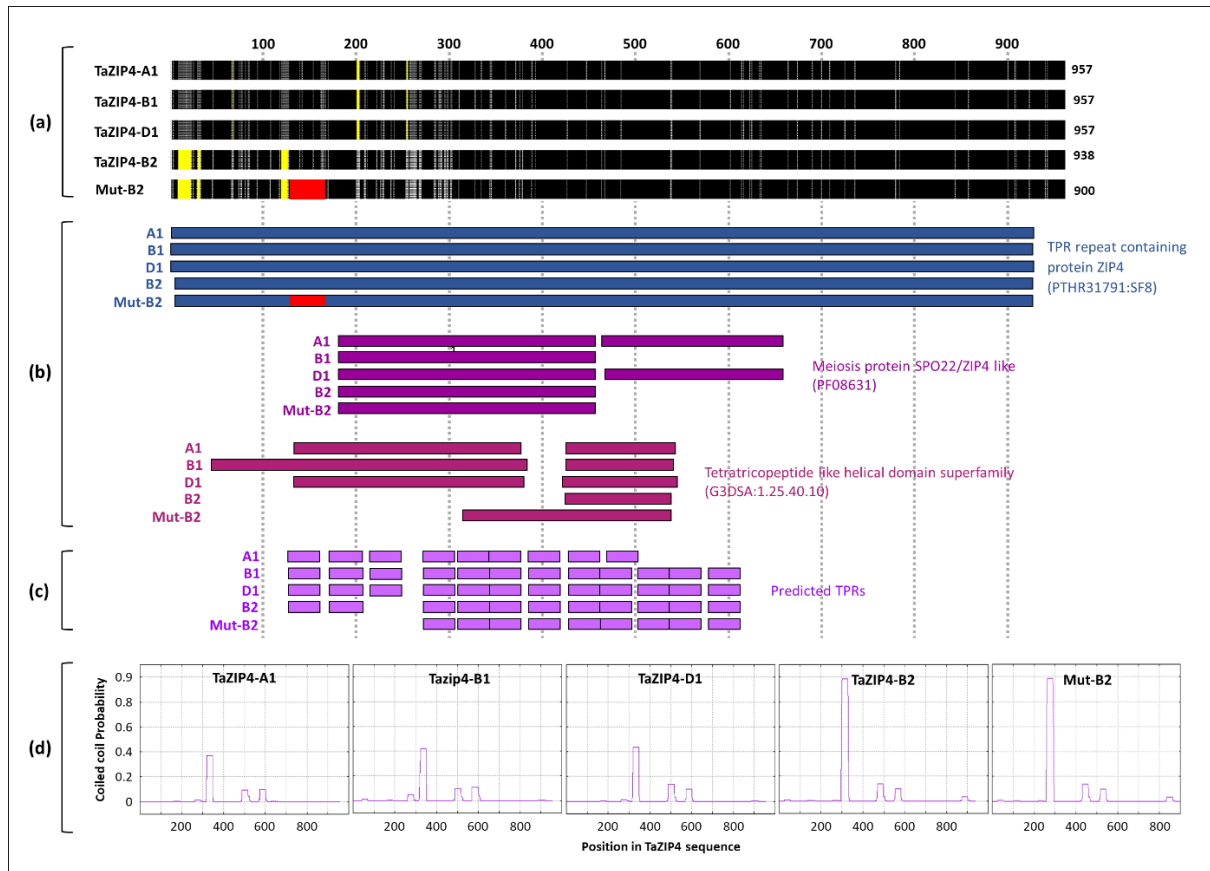

878

879 **Fig. 1 Comparison of the TaZIP4 homoeologous proteins. (a)** Multiple amino acid sequence

880 alignment of the TaZIP4 homoeologous proteins using ClustalX software (version 2.0; Higgins

881 & Sharp, 1988; Larkin *et al.*, 2007). Regions with identical amino acid sequences across the

882 four proteins are in black. Grey colour refers to the sequences with similar amino acid

883 properties and light grey refers to sequences with different amino acid properties. Yellow

884 regions indicate gaps in the sequence alignment. Mut-B2 refers to *Tazip4-B2* in the CRISPR

885 mutant. Red region shows the 38-amino acids segment that is deleted from the protein of

886 CRISPR *Tazip4-B2* mutant. **(b)** Predicted functional domains in the TaZIP4 proteins using the

887 online InterPro software (version 82.0; Mitchell *et al.*, 2019). **(c)** The predicted

888 Tetratricopeptide Repeats (TPRs) in the TaZIP4 proteins using the online TPRpred program

889 (version 11.0; Magis *et al.*, 2014; Zimmermann *et al.*, 2018). **(d)** The predicted coiled coil

890 domains in the TaZIP4 proteins using the online MARCOIL programme (Delorenzi & Speed,

891 2002; Zimmermann *et al.*, 2018).

892

893

894

895

896

897

898

899

900

901

902

903

904

905

906

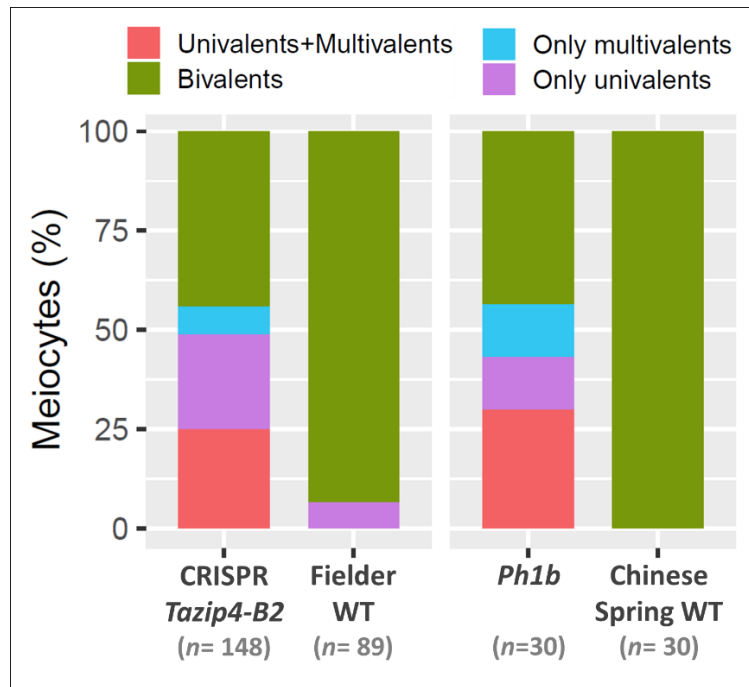

895  
896  
897  
898  
899  
900

**Fig. 2** The percentage of meocytes with meiotic abnormalities from the CRISPR *Tazip4-B2* and *ph1b* mutants, and their wild types. The data used to produce this figure is taken from Martín *et al.*, 2014 and Rey *et al.*, 2018. *n* refers to the number of scored meocytes.

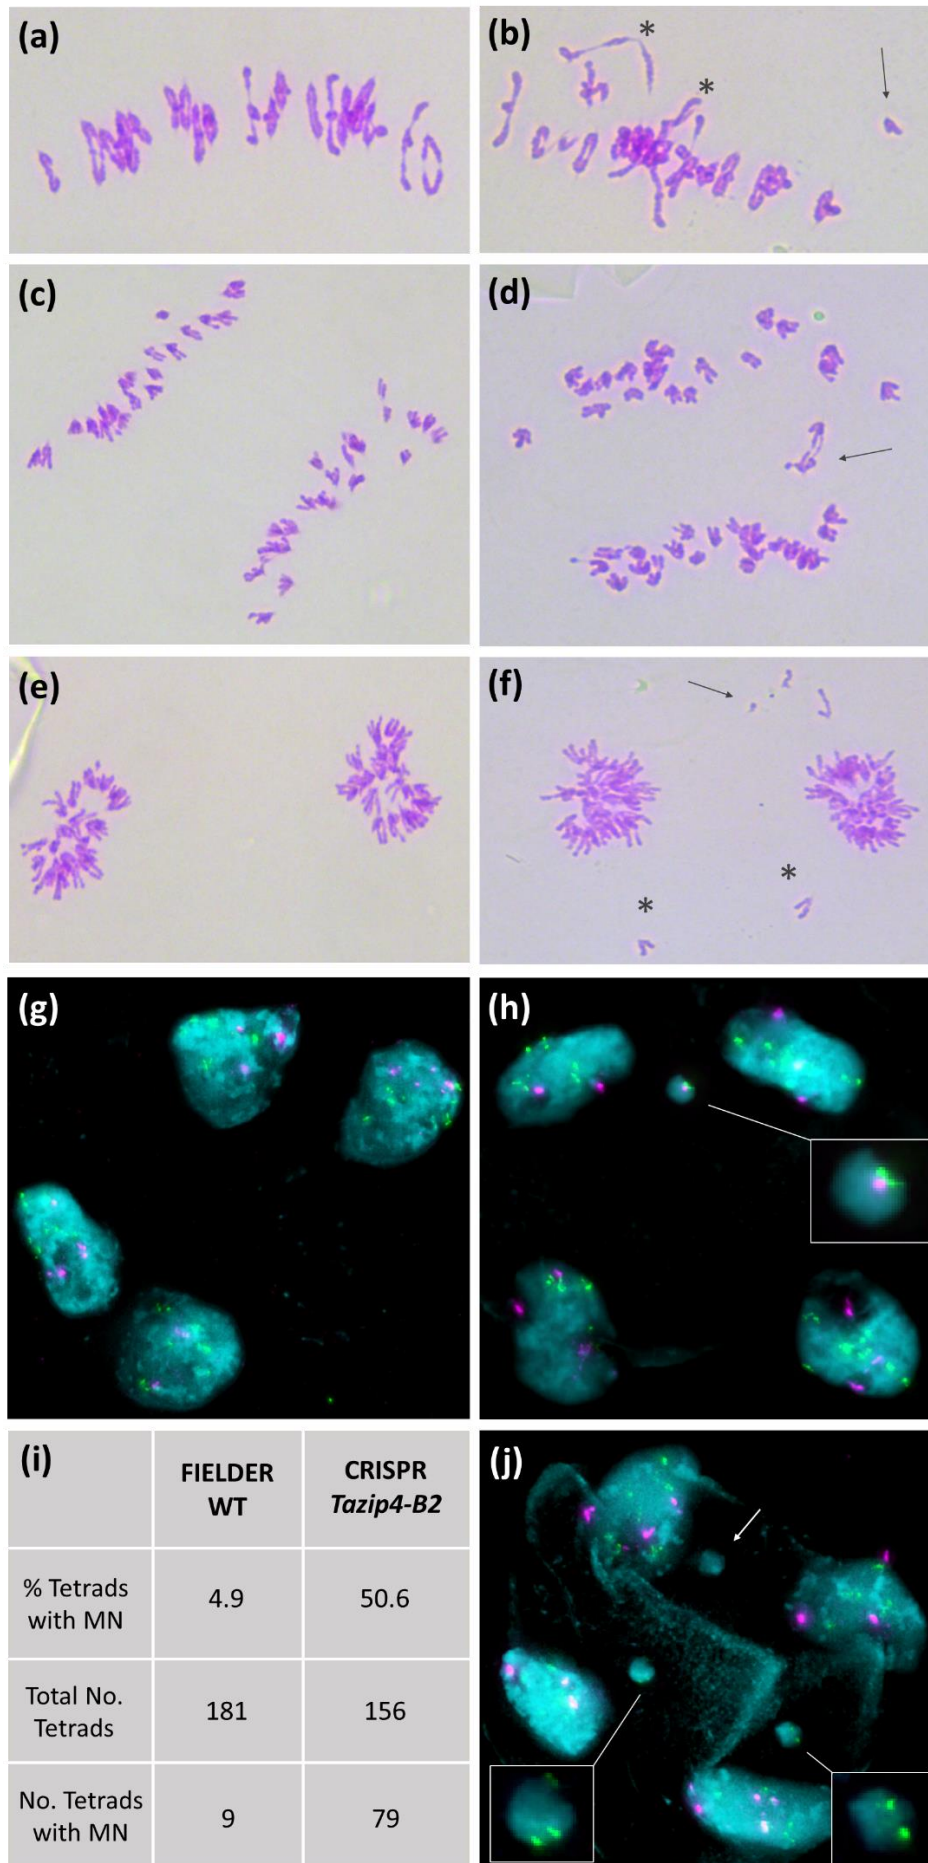

902 **Fig. 3 Meiosis in wild type (WT) Fielder (a,c,e,g) and the CRISPR *Tazip4-B2* Fielder mutant**  
903 **(b,d,f,h,j).** (a) Metaphase I in WT Fielder showing 19 ring bivalents and 3 rod bivalents. (b)  
904 Metaphase I in CRISPR *Tazip4-B2* mutant with the presence of multivalents (asterisk) and  
905 univalent (arrow). (c) Anaphase I in WT displaying equal separation of homologous  
906 chromosomes to both poles. (d) Anaphase I in CRISPR *Tazip4-B2* mutant showing lagging  
907 chromosomes . (e) Late anaphase I in WT. (f) Late anaphase I in CRISPR *Tazip4-B2* mutant  
908 showing some chromosome fragments in the periphery of equatorial plate (arrow) and  
909 chromosome mis-division in the equatorial plate (asterisk) which will not be included in any  
910 of the diads. (g, h) Tetrads shown in cyan, with repetitive probe 4P6 (in green) and pTa71 (in  
911 magenta). (g) Tetrad from WT showing 4 normal microspores. (h) Tetrad in CRISPR *Tazip4-B2*  
912 mutant showing 1 micronuclei (MN) displaying 4P6 and pTa71 signals. (j) Tetrad in CRISPR  
913 *Tazip4-B2* mutant showing 3 micronuclei, 2 of them presenting 4P6 signals. (i) Close to 5% of  
914 the tetrads show MN in WT, while 50% of the tetrads in the CRISPR *Tazip4-B2* mutant possess  
915 1, 2 or 3 MN.  
916



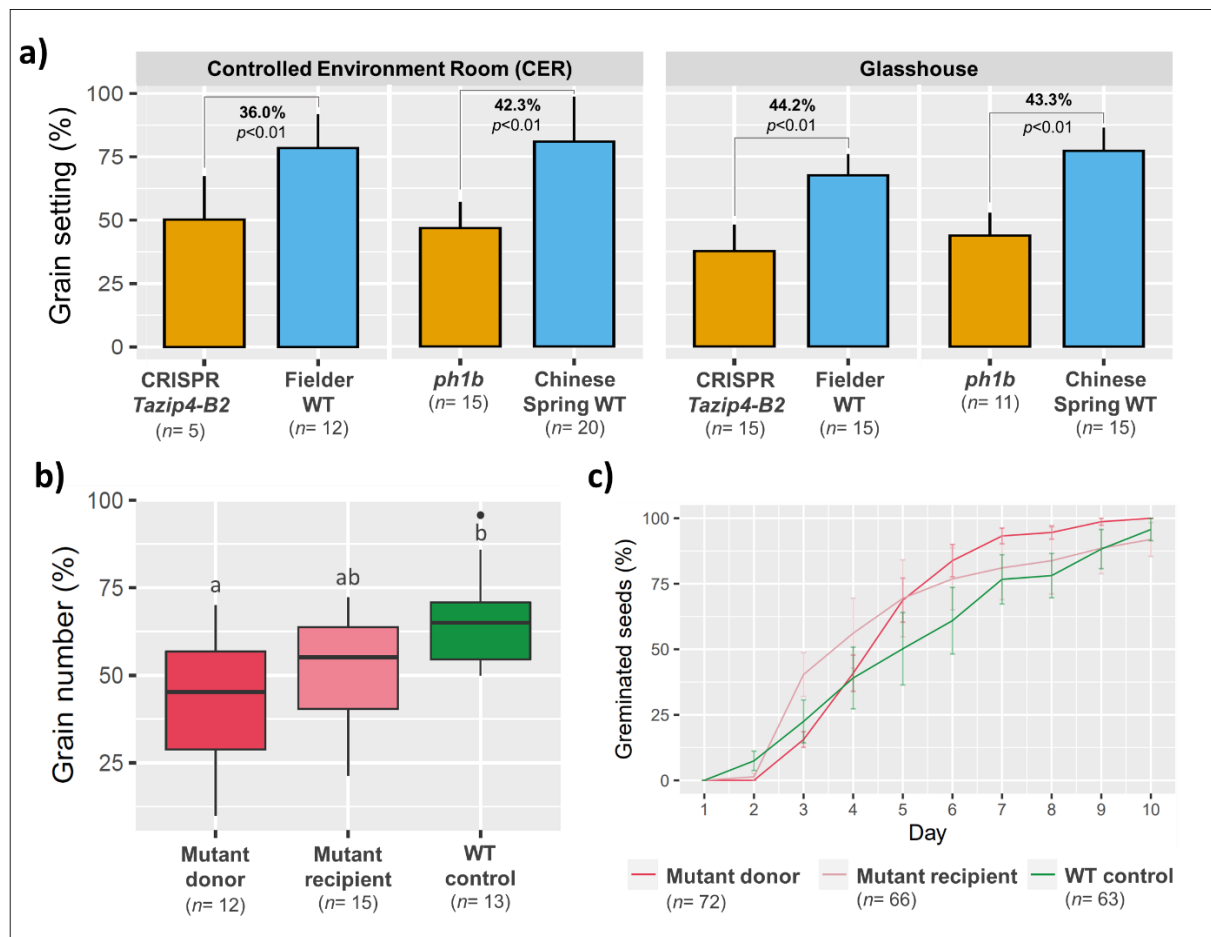

917  
918  
919  
920  
921  
922  
923  
924  
925  
926

**Fig. 4 The effect of *TaZIP4-B2* on grain setting. a)** Grain number per spike in the two *Tazip4-B2* mutants and their WT controls under the CER and glasshouse growth conditions. The percentages indicate the difference in grain setting between each mutant and its WT. *n* refers to the number of biological replicates. **b)** The normalised grain number per spike in the three treatments of the emasulation/pollination experiment. Treatments with the same letter are not significantly different. *n* refers to the number of emasculated/pollinated spikes. **c)** Seed germination rates of the seeds resulted from different pollen donor and pollen recipient genotypes. *n* refers to the number of seeds included in the seed germination experiment.

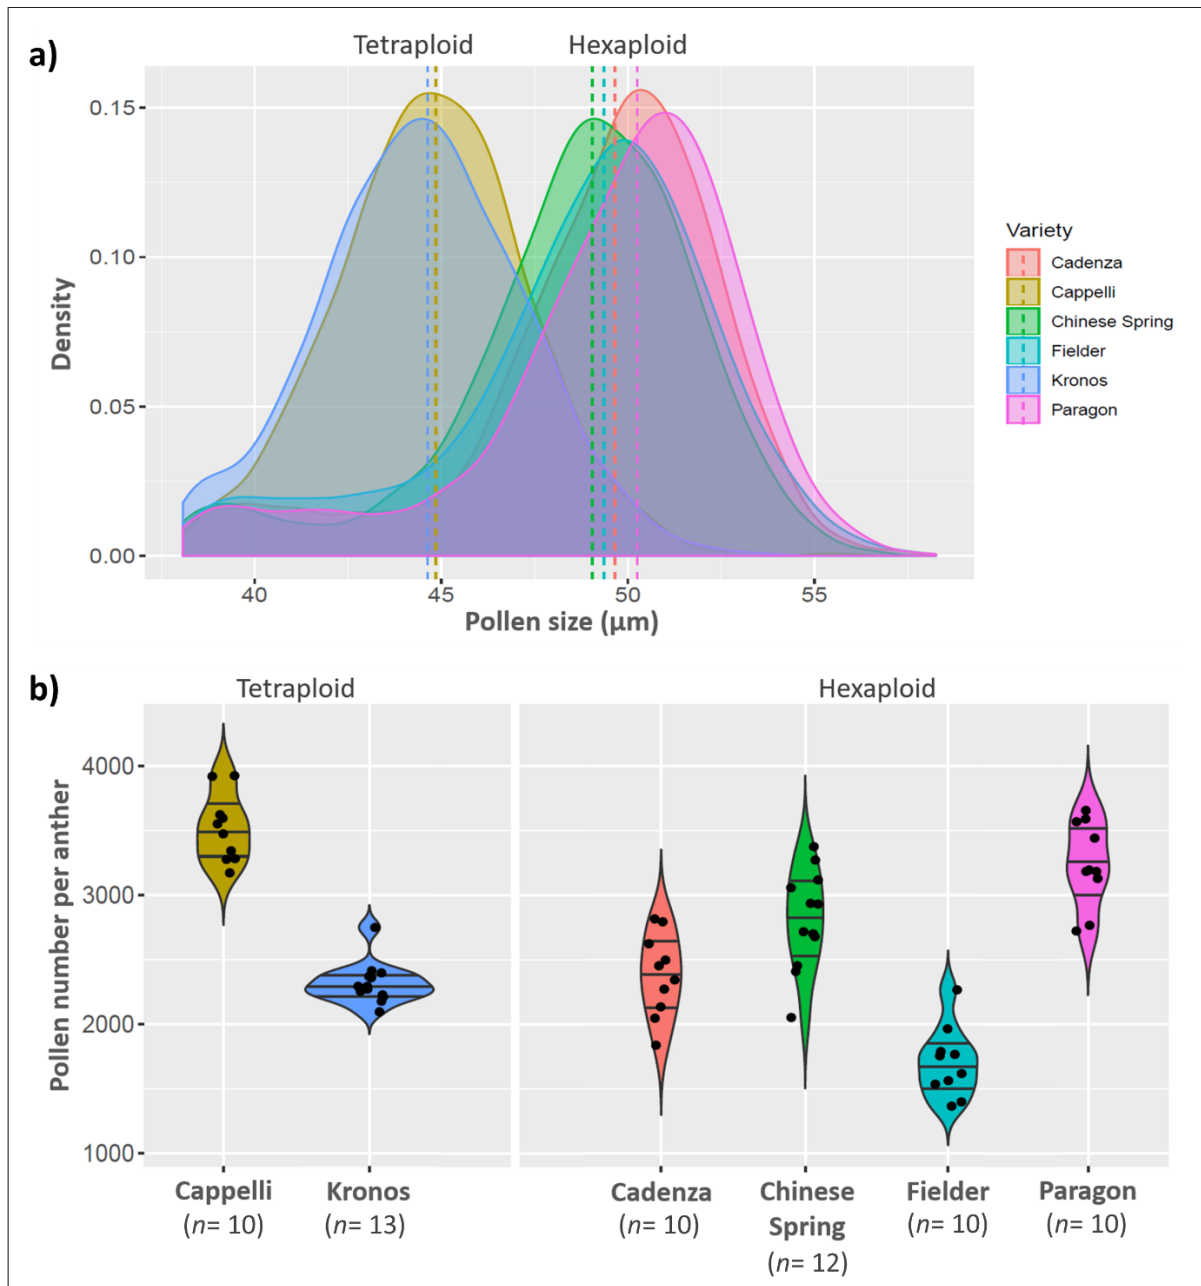

927  
928  
929  
930  
931  
932  
933  
934  
935

**Fig. 5 Pollen size and number per anther of some hexaploid and tetraploid wheats. a)** Density plot of the differential pollen size distribution data collected by coulter counter (Multiziser 4e) for four hexaploid wheats (Chinese Spring, Cadenza, Fielder and Paragon) and two tetraploid wheats (Cappelli and Kronos). Dotted lines indicate the median pollen grain size for each genotype. **b)** Pollen number per anther for the six mentioned hexaploid and tetraploid wheat varieties.  $n$  is number of plants (biological replicates).

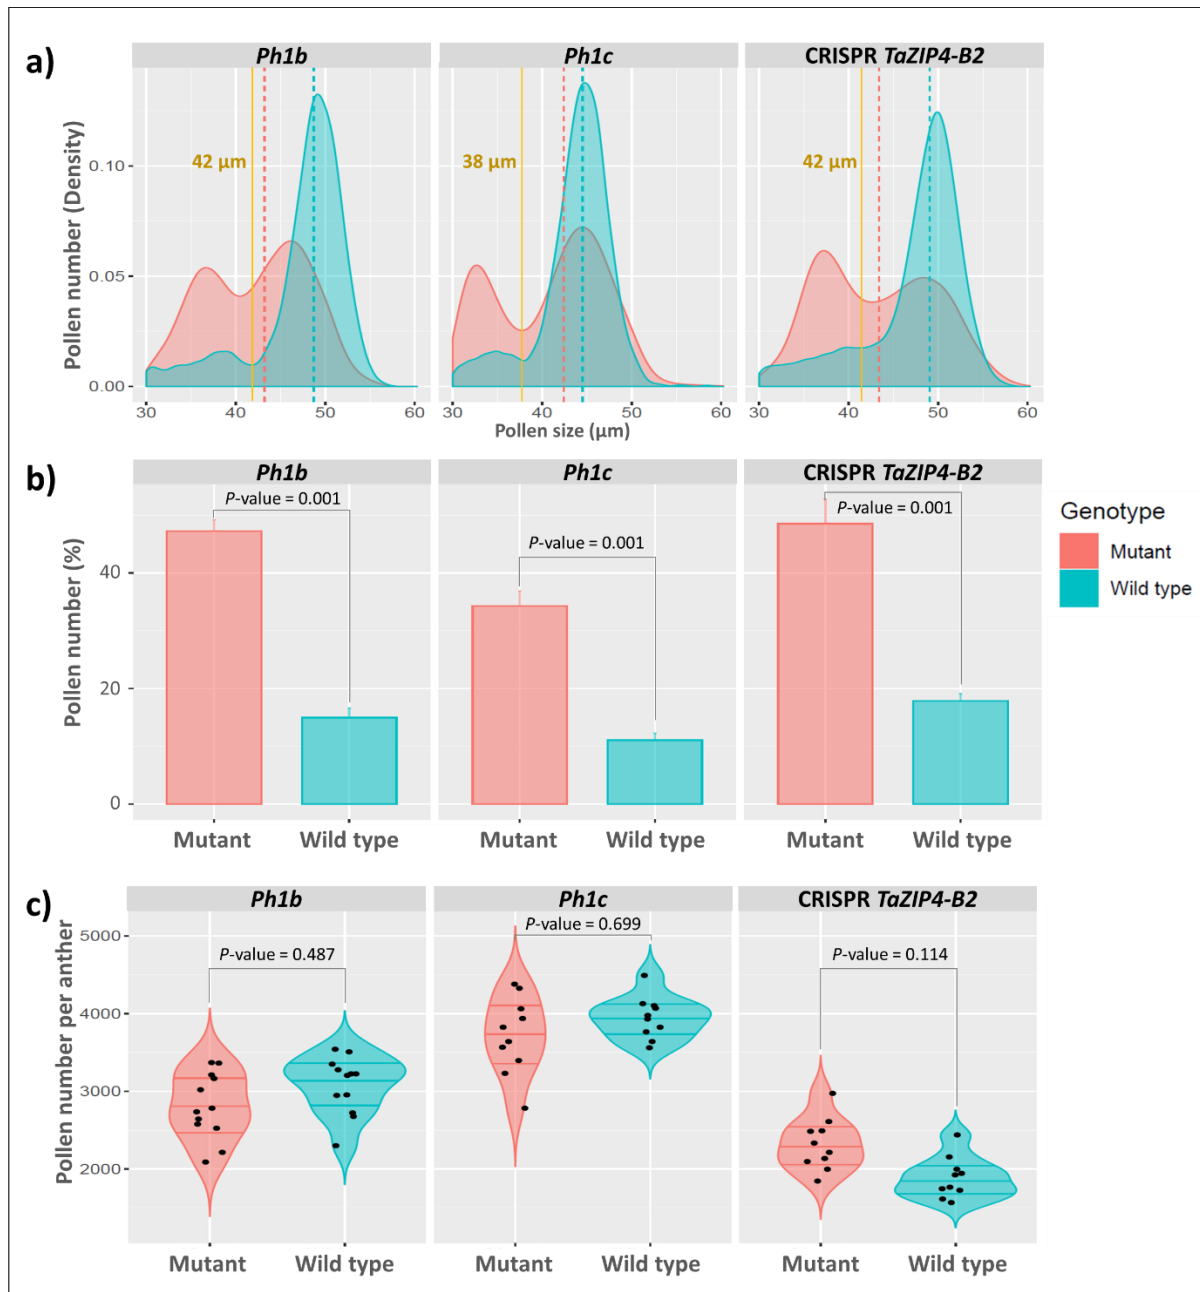

936

937

938

939

940

941

942

943

944

945

946

947

948

**Fig. 6 Pollen profiles of the three *Tazip4-B2* mutants.** **a)** Density plot of the differential pollen size distribution data collected by coulter counter (Multizer 4e) showing two distinguished peaks in all *Tazip4-B2* mutants comparing with their corresponding wild types. Dotted lines indicate the median pollen grain size for each genotype. Yellow lines indicate the borderline between normal and small pollen for each genotypes group. **b)** Percentages of the small pollen grains for each genotype (mutants and wild types). Pollen grain is considered small when it is  $\leq 42 \mu\text{m}$  and  $\leq 38 \mu\text{m}$  for hexaploid and tetraploid wheat pollen size, respectively. **c)** comparison of the number of pollen grains per anther between each *Tazip4-B2* mutant and its wild type. No significant difference in pollen number per anther was found between any of the mutants and its wild type.

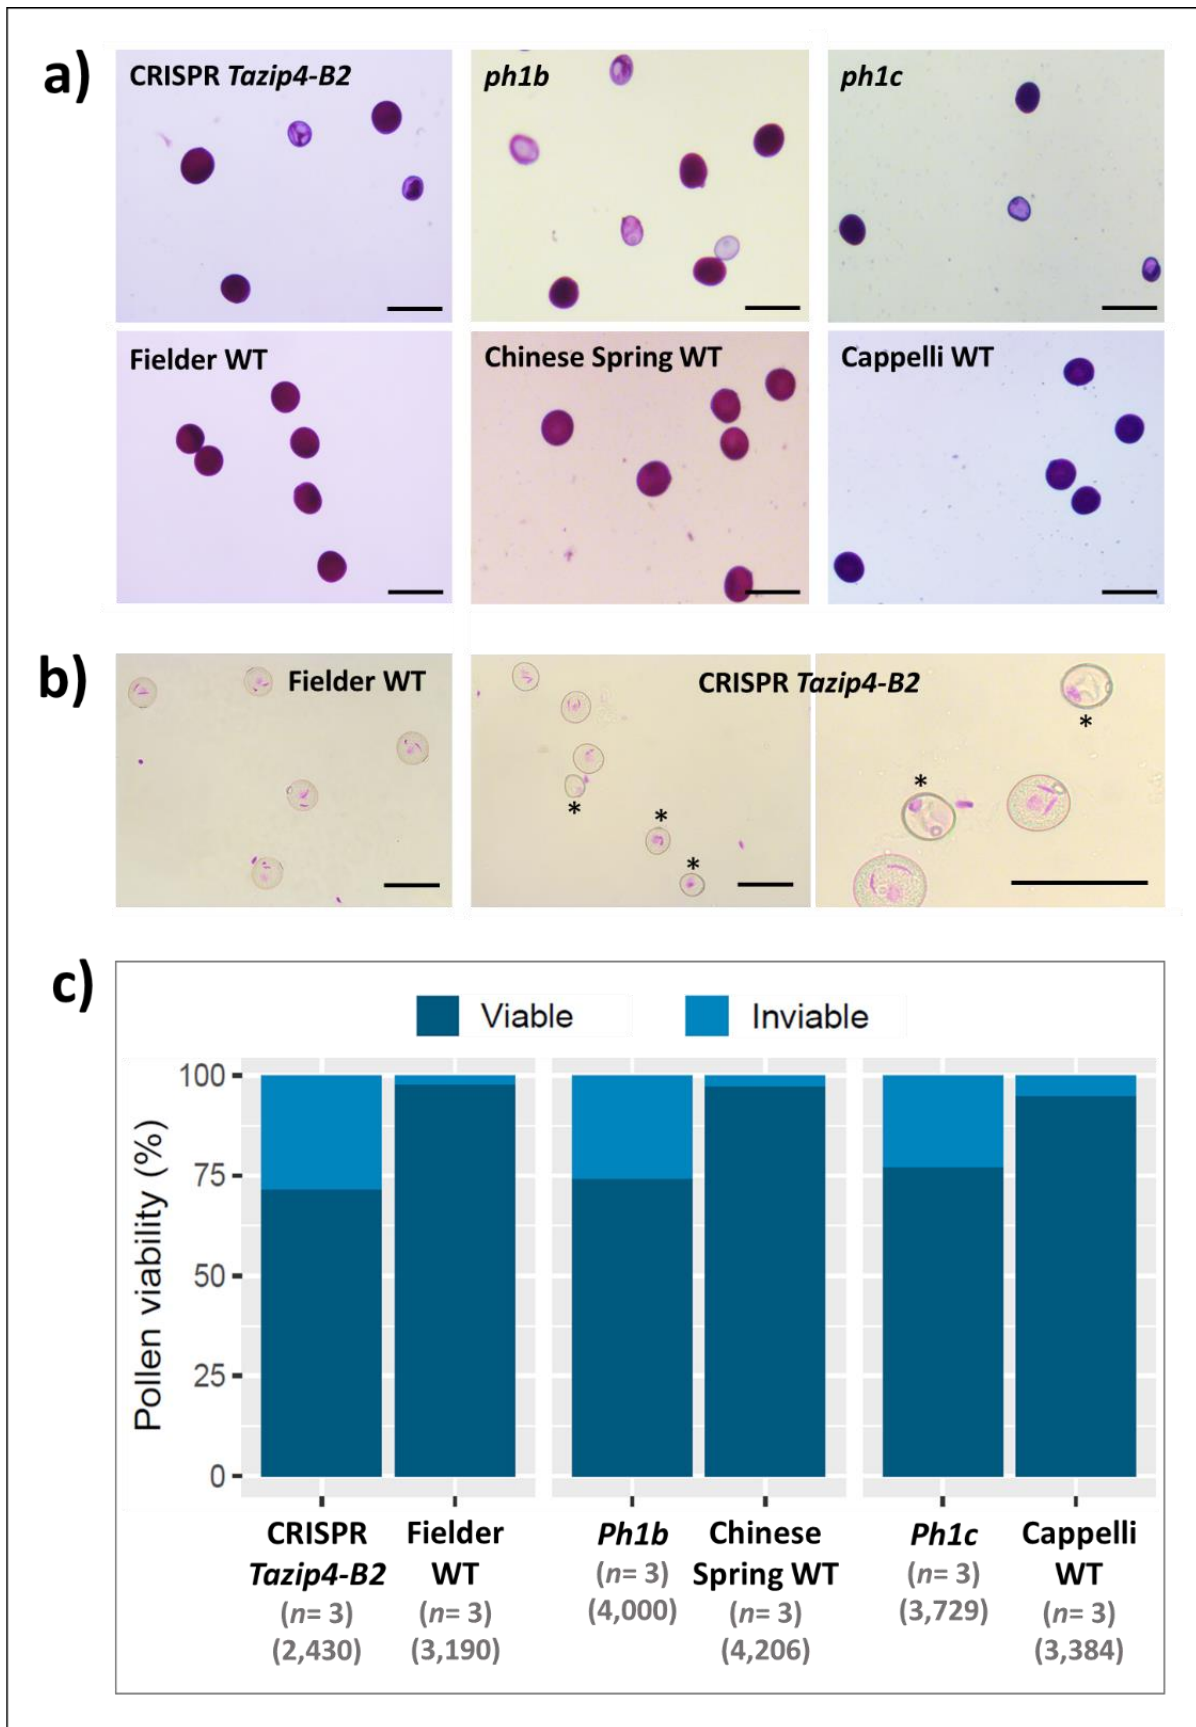

949  
950  
951  
952

**Fig. 7 Pollen viability of the *Tazip4-B2* mutants.** a) Pollen with magenta colour after staining with Alexander stain was considered viable, whereas blue-green pollen was considered inviable. Bars equal 100  $\mu$ m in length. b) Feulgen staining of pollens from anthers at anthesis

953 in CRISPR *Tazip4-B2* mutant and its wild type (cv. Fielder) shows normal trinucleate pollen  
954 grains in the wild type, while almost half of the pollens were immature and/or abnormal in  
955 the mutant. Immature and abnormal pollen grains are indicated by an asterisk. Bars equal  
956 100  $\mu\text{m}$  in length. **c)** Percentages of viable and inviable pollens according to Alexander staining  
957 method for the three *Tazip4-B2* mutants and their wild types. *n* refers to the number of  
958 biological replicates. The numbers between brackets refer to the total number of scored  
959 pollen grains for each genotype.
